# Supplementary material for: Current Research on the Bioprospection of Linear Diterpenes from Bifurcaria bifurcata: From Extraction Methodologies to Possible Applications
Source: PubMed Central journal article supplement (PMC6835738; doi:10.3390/md17100556), 2019-09-28
Supplement: marinedrugs-17-00556-s001.pdf [file marinedrugs-17-00556-s001.pdf]

## Supplementary Materials:

# Current Research on the Bioprospection of Linear Diterpenes from *Bifurcaria bifurcata*: from Extraction Methodologies to Possible Applications

Adriana C.S. Pais <sup>1</sup>, Jorge A. Saraiva <sup>2</sup>, Sílvia M. Rocha <sup>2</sup>, Armando J.D. Silvestre <sup>1</sup> and Sónia A.O. Santos <sup>1,\*</sup>

<sup>1</sup> CICECO-Aveiro Institute of Materials, Chemistry Department, University of Aveiro, 3810-193 Aveiro, Portugal;

<sup>2</sup> QOPNA/LAQV & REQUIMTE, Chemistry Department, University of Aveiro, 3810-193 Aveiro, Portugal;

\* Correspondence: santos.sonia@ua.pt; Tel.: +351-234-370-711 (S.A.O.S.)

**Table S1** – MS data of linear diterpenes identified in *B. bifurcata*.

| Compound | MS data                                                                                                                                                                                                                                                                                                                                                                   | Ref. |
|----------|---------------------------------------------------------------------------------------------------------------------------------------------------------------------------------------------------------------------------------------------------------------------------------------------------------------------------------------------------------------------------|------|
| 1        | EIMS (70 eV) <i>m/z</i> : 288, 189, 153, 135, 121, 85 and 69.                                                                                                                                                                                                                                                                                                             | [1]  |
| 2        | EIMS (70 eV) <i>m/z</i> (rel. Int.): 320 (1);<br>HRMS (peak matching): <i>m/z</i> 320.2362 calc. for C <sub>20</sub> H <sub>32</sub> O <sub>3</sub> , 320.2351.                                                                                                                                                                                                           | [2]  |
| 3        | HRMS: 334.2506 [M] <sup>+</sup> (calc. for C <sub>21</sub> H <sub>34</sub> O <sub>3</sub> , 334.2508);<br>EIMS (70 eV) <i>m/z</i> (rel. int.): 334 [M] <sup>+</sup> (0.1), 316 [M-H <sub>2</sub> O] <sup>+</sup> (0.2), 265(20), 233(100), 215(0.4), 187(0.7), 137(21), 123(60), 107(19), 93(65), 81(40), 69(58), 55(53).                                                 | [3]  |
| 4        | HRMS: 304.2408 [M] <sup>+</sup> (calc. for C <sub>20</sub> H <sub>32</sub> O <sub>2</sub> , 304.2402);<br>EIMS (70 eV) <i>m/z</i> (rel. Int.): 304 [M] <sup>+</sup> (0.02), 286 [M-H <sub>2</sub> O] <sup>+</sup> (0.90), 235 (6), 217(7), 199(6), 189(3), 159(14), 149(7), 147(9), 135(18), 133(16), 123(20), 109(24), 107(30), 95(100), 93(71), 81(86), 69(68), 55(83). | [3]  |

|    |                                                                                                                                                                                                                                                                                                                                                                                  |      |
|----|----------------------------------------------------------------------------------------------------------------------------------------------------------------------------------------------------------------------------------------------------------------------------------------------------------------------------------------------------------------------------------|------|
| 5  | HRMS: 304.2410 [M] <sup>+</sup> (calc. for C <sub>20</sub> H <sub>32</sub> O <sub>2</sub> , 304.2402);<br>EIMS (70 eV) <i>m/z</i> (rel. Int.): 304 [M] <sup>+</sup> (0.05), 286 [M-H <sub>2</sub> O] <sup>+</sup> (0.16), 235 (34), 217(4), 199(4), 189(3), 159(11), 149(10), 147(8), 135(9), 133(14), 123(20), 109(24), 107(23), 95(55), 93(91), 81(87), 69(72), 55(100).       | [3]  |
| 6  | HRMS: 304.2407 [M-H <sub>2</sub> O] <sup>+</sup> (calc. for C <sub>20</sub> H <sub>32</sub> O <sub>2</sub> , 304.2402);<br>EIMS (70 eV) <i>m/z</i> (rel. Int.): 304 [M-H <sub>2</sub> O] <sup>+</sup> (0.3), 286 [M-2H <sub>2</sub> O] <sup>+</sup> (0.3), 253(0.5), 137(9), 136(9), 95(1), 81(53), 69(100), 55(9).                                                              | [4]  |
| 7  | HRMS: 306.2565 [M-H <sub>2</sub> O] <sup>+</sup> (calc. for C <sub>20</sub> H <sub>34</sub> O <sub>2</sub> , 306.2559);<br>EIMS (70 eV) <i>m/z</i> (rel. Int.): 306 [M-H <sub>2</sub> O] <sup>+</sup> (0.1), 288 [M-2H <sub>2</sub> O] <sup>+</sup> (0.5), 237(2), 219(2), 201(4), 135(11), 121(8), 109(11), 95(16), 85(2), 81(100), 71(10), 69(25), 67(9), 55(23), 53(6).       | [4]  |
| 8  | HRMS: C <sub>20</sub> H <sub>34</sub> O <sub>3</sub>                                                                                                                                                                                                                                                                                                                             | [5]  |
| 9  | [M] <sup>+</sup> 306 C <sub>20</sub> H <sub>34</sub> O <sub>2</sub> ; [M-H <sub>2</sub> O] <sup>+</sup> 288                                                                                                                                                                                                                                                                      | [6]  |
| 10 | EIMS (70 eV) <i>m/z</i> (rel. int.): 284 [M-H <sub>2</sub> O] <sup>+</sup> (9), 218 (10), 203 (8), 175 (10), 135 (21), 107 (15), 93 (23), 85 (100), 81 (58), 69 (37), 43 (99).                                                                                                                                                                                                   | [7]  |
| 11 | HRMS: 316.2042 [M-H <sub>2</sub> O] <sup>+</sup> (calc. for C <sub>20</sub> H <sub>28</sub> O <sub>3</sub> , 316.2038);<br>EIMS (70 eV) <i>m/z</i> (rel. Int.): 334 [M] <sup>+</sup> (0.2), 316 [M-H <sub>2</sub> O] <sup>+</sup> (0.4), 218 (15), 203 (14), 175 (12), 136 (12), 123 (9), 94 (13), 85 (100), 81 (51), 69 (27).                                                   | [7]  |
| 12 | HRMS: 316.2044 [M-H <sub>2</sub> O] <sup>+</sup> (calc. for C <sub>20</sub> H <sub>28</sub> O <sub>3</sub> , 316.2038);<br>EIMS (70 eV) <i>m/z</i> (rel. int.): 316 [M-H <sub>2</sub> O] <sup>+</sup> (0.4), 207 (4), 135 (6), 123 (5), 109 (7), 107 (7), 93 (12), 85 (100), 69 (19), 68 (27), 67 (15), 55 (14).                                                                 | [8]  |
| 13 | HRMS: <i>m/z</i> 322.2505 [M] <sup>+</sup> (calc. for C <sub>20</sub> H <sub>34</sub> O <sub>3</sub> , <i>m/z</i> 322.2508);<br>EIMS (70 eV) <i>m/z</i> (rel. int.): 322 [M] <sup>+</sup> (0.1), 304 [M-H <sub>2</sub> O] <sup>+</sup> (0.1), 286 [M-2H <sub>2</sub> O] <sup>+</sup> (0.1), 219 (5), 186 (7), 168 (13), 119 (22), 107 (18), 93 (38), 85 (96), 69 (15), 57 (100). | [9]  |
| 14 | HRMS (ESI-TOF) <i>m/z</i> 347.2559 [M+Na] <sup>+</sup> (calc. for C <sub>20</sub> H <sub>36</sub> O <sub>3</sub> Na, 347.2557).                                                                                                                                                                                                                                                  | [10] |

|    |                                                                                                                                                                                                                                                                                                                                                                                     |      |
|----|-------------------------------------------------------------------------------------------------------------------------------------------------------------------------------------------------------------------------------------------------------------------------------------------------------------------------------------------------------------------------------------|------|
| 15 | HREIMS [M+Na] <sup>+</sup> <i>m/z</i> 327.23193 (calc. for C <sub>20</sub> H <sub>32</sub> O <sub>2</sub> Na, 327.22945).                                                                                                                                                                                                                                                           | [11] |
| 16 | [M] <sup>+</sup> 320 (C <sub>20</sub> H <sub>32</sub> O <sub>3</sub> ) ( <i>m/z</i> calculated for 320.23511, found 320.2353)                                                                                                                                                                                                                                                       | [6]  |
| 17 | MS <i>m/z</i> : 300 [M-18] <sup>+</sup> , 83.0497                                                                                                                                                                                                                                                                                                                                   | [12] |
| 21 | HRMS: 306.2558 [M] <sup>+</sup> (calc. for C <sub>20</sub> H <sub>34</sub> O <sub>2</sub> , 306.2559);<br>EIMS (70 eV) <i>m/z</i> (rel. int.): 306 [M] <sup>+</sup> (0.4), 288 [M-H <sub>2</sub> O] <sup>+</sup> (0.9), 211 (3), 188 (6), 135 (12), 121 (24), 107 (12), 93 (15), 85 (100), 81 (11), 68 (29), 57 (60), 41 (19).                                                      | [8]  |
| 22 | (Acetylated): HRMS: 360.2297 [M] <sup>+</sup> (calc. for C <sub>22</sub> H <sub>32</sub> O <sub>4</sub> , 360.2300);<br>EIMS (70 eV) <i>m/z</i> (rel. Int.): 360 [M] <sup>+</sup> (0.1), 300 [M-HOAc] <sup>+</sup> (0.5), 277 (2.9), 217 (4.3), 207 (3.4), 199 (1.5), 151 (20.4), 149 (6.7), 134 (4.6), 123 (3.8), 119(3.2), 107(2.7) 95(5.1), 83(100), 77(2.1), 60(1.0), 55(19.3). | [8]  |
| 26 | HRMS: <i>m/z</i> 322.2511 [M] <sup>+</sup> (calc. for C <sub>20</sub> H <sub>34</sub> O <sub>3</sub> , <i>m/z</i> 322.2508);<br>EIMS (70 eV) <i>m/z</i> (rel. int.): 322 [M] <sup>+</sup> (0.3), 286 [M-2H <sub>2</sub> O] <sup>+</sup> (0.3), 253 (0.5), 137 (9), 136 (9), 95 (1), 83 (53), 69 (100), 55 (9).                                                                      | [9]  |
| 27 | HRMS: <i>m/z</i> 320.2353 [M] <sup>+</sup> (calc. for C <sub>20</sub> H <sub>32</sub> O <sub>3</sub> , <i>m/z</i> 320.2352);<br>EIMS (70 eV) <i>m/z</i> (rel. int.): 320 [M] <sup>+</sup> (0.4), 302 [M-H <sub>2</sub> O] <sup>+</sup> (0.1), 289 (0.1), 201 (0.1), 151 (2), 138 (2), 99 (10), 95 (6), 93 (3), 83 (100), 81 (6), 73 (5), 71 (6), 69 (6), 55 (19), 43 (34).          | [9]  |
| 28 | HRMS: <i>m/z</i> 322.2501 [M] <sup>+</sup> (calc. for C <sub>20</sub> H <sub>34</sub> O <sub>3</sub> , <i>m/z</i> 322.2508);<br>EIMS (70 eV) <i>m/z</i> (rel. int.): 322 [M] <sup>+</sup> (0.2), 286 [M-2H <sub>2</sub> O] <sup>+</sup> (0.1), 211 (4), 188 (7), 121 (25), 107 (15), 93 (13), 85 (100), 81 (12), 68 (28), 57 (59).                                                  | [9]  |
| 31 | HR(+)-ESI-MS: <i>m/z</i> calc. for C <sub>20</sub> H <sub>30</sub> O <sub>3</sub> Na, [M + Na] <sup>+</sup> 341.2093, found: 341.2092                                                                                                                                                                                                                                               | [13] |
| 32 | HR(+)-ESI-MS: <i>m/z</i> calc. for C <sub>20</sub> H <sub>28</sub> O <sub>3</sub> Na, [M + Na] <sup>+</sup> 339.1936, found: 339.1933                                                                                                                                                                                                                                               | [13] |

|    |                                                                                                                                                                                                                                                                                                                                        |      |
|----|----------------------------------------------------------------------------------------------------------------------------------------------------------------------------------------------------------------------------------------------------------------------------------------------------------------------------------------|------|
| 33 | HR(+)-ESI-MS: <i>m/z</i> calc. for C <sub>20</sub> H <sub>32</sub> O <sub>3</sub> Na, [M + Na] <sup>+</sup> 343.2249, found: 343.2264                                                                                                                                                                                                  | [13] |
| 34 | HR(+)-ESI-MS: <i>m/z</i> calc. for C <sub>20</sub> H <sub>32</sub> O <sub>2</sub> Na, [M + Na] <sup>+</sup> 327.2300, found: 327.2298                                                                                                                                                                                                  | [13] |
| 35 | HRESI(+)-MS: <i>m/z</i> calc. for C <sub>21</sub> H <sub>32</sub> O <sub>3</sub> K, [M + K] <sup>+</sup> 371.1983, found: 371.2131                                                                                                                                                                                                     | [14] |
| 36 | HREI(+)-MS: <i>m/z</i> calc. for C <sub>20</sub> H <sub>26</sub> O <sub>2</sub> , [M] <sup>+</sup> 298.1932, found: 298.1928                                                                                                                                                                                                           | [14] |
| 39 | [M] <sup>+</sup> <i>m/z</i> 290, 69 [C <sub>5</sub> H <sub>9</sub> ] <sup>+</sup> , 81 [C <sub>6</sub> H <sub>9</sub> ] <sup>+</sup> , 121 [C <sub>11</sub> H <sub>19</sub> ] <sup>+</sup> , 272 [M-H <sub>2</sub> O] <sup>+</sup>                                                                                                     | [15] |
| 40 | EIMS (70 eV) <i>m/z</i> (rel. Int.): 288 (2);<br>HRMS (peak matching) <i>m/z</i> 288.2465 calc. for C <sub>20</sub> H <sub>32</sub> O, 288.2453.                                                                                                                                                                                       | [2]  |
| 41 | HRMS of the TMSi ether: [M-TMSiOH] <sup>+</sup> 360.2855 (calc. for C <sub>23</sub> H <sub>40</sub> SiO, 360.2848);<br>EIMS (70 eV) <i>m/z</i> (rel. Int.): 288 (1) [M-H <sub>2</sub> O] <sup>+</sup> , 257 (1), 147 (11), 135 (31), 109 (36), 93 (57), 81 (100), 43 (77).                                                             | [16] |
| 42 | HRMS: 288.2450 [M] <sup>+</sup> (calc. for C <sub>20</sub> H <sub>32</sub> O, 288,2453);<br>EIMS (70 eV) <i>m/z</i> (rel. int.): 288 [M] <sup>+</sup> (0.1), 270 [M-H <sub>2</sub> O] <sup>+</sup> (0.4), 255 (0.2), 201(10), 187 (4), 175 (9), 159 (12), 148 (19), 135 (55), 119 (32), 107 (60), 93 (100), 81 (35), 69 (70), 55 (41). | [3]  |
| 44 | HRESI(+)-MS <i>m/z</i> calc. for C <sub>20</sub> H <sub>34</sub> O <sub>2</sub> Na, [M + Na] <sup>+</sup> 329.2457, found: 329.2478.                                                                                                                                                                                                   | [14] |
| 46 | [M] <sup>+</sup> <i>m/z</i> 278, <i>m/z</i> 43 [C <sub>3</sub> H <sub>7</sub> ] <sup>+</sup> , 57 [C <sub>4</sub> H <sub>9</sub> ] <sup>+</sup> , 68, 82, 95 [C <sub>7</sub> H <sub>11</sub> ] <sup>+</sup> , 109 and 123 [C <sub>9</sub> H <sub>15</sub> ] <sup>+</sup>                                                               | [15] |

Calc. – calculated; rel. int – relative intensity;

1 **Table S2** – <sup>1</sup>H NMR spectral data for linear diterpenes identified in *B. bifurcata*.<sup>a</sup>

|      | 1 (360 MHz)                    | 2 (360 MHz)                    | 3 (200 MHz)                    | 4 (200 MHz)                    | 5 (200 MHz)                    | 6 (400 MHz)                    | 7 (400 MHz)                    | 8 (200 MHz)                    | 9 (360 MHz)                        | 9 (200 MHz)                                |
|------|--------------------------------|--------------------------------|--------------------------------|--------------------------------|--------------------------------|--------------------------------|--------------------------------|--------------------------------|------------------------------------|--------------------------------------------|
| H    | CDCl <sub>3</sub> <sup>b</sup> | CDCl <sub>3</sub> <sup>b</sup> | CDCl <sub>3</sub> <sup>b</sup> | CDCl <sub>3</sub> <sup>b</sup> | CDCl <sub>3</sub> <sup>b</sup> | CDCl <sub>3</sub> <sup>b</sup> | CDCl <sub>3</sub> <sup>b</sup> | CDCl <sub>3</sub> <sup>b</sup> | CDCl <sub>3</sub> <sup>b</sup>     | C <sub>6</sub> D <sub>6</sub> <sup>b</sup> |
| 1    | 4.09 <i>d</i> (6.8)            |                                |                                | 9.88 <i>d</i> (8.0)            | 9.82 <i>d</i> (8.0)            | 4.10 <i>d</i> (7.0)            | 4.12 <i>d</i> (6.9)            | 4.19 <i>d</i> (6.8)            | 4.10 <i>d</i> (6.7)                | 4.11 <i>d</i> (6.6)                        |
| 2    | 5.35 <i>t</i> (6.8)            | 5.66 <i>s</i>                  | 5.66 <i>s</i>                  | 5.78 <i>d</i> (8.0)            | 5.82 <i>d</i> (8.0)            | 5.39 <i>t</i> (7.0)            | 5.38 <i>t</i> (7.0)            | 5.46 <i>t</i> (6.8)            | 5.42 <i>t</i> (6.7)                | 5.50 <i>t</i> (6.6)                        |
| 3    |                                |                                |                                |                                |                                |                                |                                |                                |                                    |                                            |
| 4    | 1.99 <i>m</i>                  | 2.17 <i>m</i>                  | 2.15 <i>m</i>                  | 2.15 <i>m</i>                  | 2.55 <i>t</i> (7.3)            | 1.95 – 2.15 <i>m</i>           | 1.99 <i>t</i> (7.0)            | 2.77 <i>d</i> (5.0)            | 2.00 <i>m</i>                      | 2.04 <i>m</i>                              |
| 5    | 2.07 <i>m</i>                  | 2.16 <i>d</i> (4.5)            | 2.12 <i>m</i>                  | 2.15 <i>m</i>                  | 2.11 <i>m</i>                  | 1.55 – 1.75 <i>m</i>           | 1.40-1.48 <i>m</i>             | 5.65 <i>dt</i> (15.0;<br>5.0)  | 2.08 <i>m</i>                      | 2.12 <i>m</i>                              |
| 6    | 5.07 <i>t</i> (6.8)            | 5.06 <i>t</i> (4.5)            | 5.09 <i>t</i> (7.0)            | 4.99 <i>t</i> (4.0)            | 5.05 <i>t</i> (7.3)            | 4.01 <i>t</i> (7.0)            | 1.38-1.44 <i>m</i>             | 5.57 <i>d</i> (15.0)           | 5.12 <i>t</i> (6.7)                | 5.22 <i>t</i> (6.7)                        |
| 7    |                                |                                |                                |                                |                                |                                |                                |                                |                                    |                                            |
| 8    | 1.99 <i>m</i>                  | 2.00 <i>m</i>                  | 2.00 <i>m</i>                  | 1.95 <i>m</i>                  | 1.98 <i>m</i>                  | 1.95-2.15 <i>m</i>             | 1.45-1.50 <i>m</i>             | 1.58 <i>m</i>                  | 2.00 <i>m</i>                      | 2.04 <i>m</i>                              |
| 9    | 2.07 <i>m</i>                  | 2.10 <i>m</i>                  | 2.10 <i>m</i>                  | 1.95 <i>m</i>                  | 2.07 <i>m</i>                  | 2.10-2.30 <i>m</i>             | 2.05 <i>m</i>                  | 2.08 <i>m</i>                  | 2.08 <i>m</i>                      | 2.18 <i>m</i>                              |
| 10   | 5.32 <i>t</i> (6.8)            | 5.34 <i>t</i> (6.8)            | 5.36 <i>t</i> (7.0)            | 5.26 <i>t</i> (6.3)            | 5.28 <i>t</i> (6.8)            | 5.36 <i>t</i> (7.0)            | 5.37 <i>t</i> (7.0)            | 5.43 <i>t</i> (6.6)            | 5.18 <i>t</i> (6.7)                | 5.25 <i>t</i> (6.7)                        |
| 11   |                                |                                |                                |                                |                                |                                |                                |                                |                                    |                                            |
| 12   | 3.92 <i>t</i> (6.7)            | 3.96 <i>dd</i> (6,7)           | 3.97 <i>t</i> (7.0)            | 3.87 <i>t</i> (6.6)            | 3.90 <i>t</i> (6.8)            | 3.94 <i>t</i> (6.7)            | 3.94 <i>t</i> (6.7)            | 4.00 <i>t</i> (7.0)            | 2.09 <i>m</i>                      | 2.21-2.29 <i>m</i>                         |
| 13   | 2.20 <i>dd</i> (6,7,7)         | 2.2 <i>ddd</i> (6,7,7)         | 2.20 <i>m</i>                  | 2.19 <i>m</i>                  | 2.18 <i>m</i>                  | 2.10-2.30 <i>m</i>             | 2.20-2.28 <i>m</i>             | 2.21 <i>m</i>                  | 4.37 <i>ddd</i> (8.2;<br>8.2; 5.3) | 4.48 <i>ddd</i> (8.2;<br>8.2; 5.1)         |
| 14   | 5.04 <i>t</i> (7)              | 5.06 <i>t</i> (7)              | 5.09 <i>t</i> (7.0)            | 4.99 <i>t</i> (6.9)            | 5.05 <i>t</i> (7.0)            | 5.04 <i>t</i> (7.0)            | 5.05 <i>t</i> (7.2)            | 5.11 <i>t</i> (7.0)            | 5.16 <i>d</i> (8.2)                | 5.32 <i>d</i> (8.3)                        |
| 15   |                                |                                |                                |                                |                                |                                |                                |                                |                                    |                                            |
| 16   | 1.68 <i>s</i>                  | 1.70 <i>s</i>                  | 1.71 <i>s</i>                  | 1.61 <i>s</i>                  | 1.65 <i>s</i>                  | 1.67 <i>s</i>                  | 1.69 <i>s</i>                  | 1.75 <i>s</i>                  | 1.69 <i>s</i>                      | 1.63 <i>s</i>                              |
| 17   | 1.60 <i>s</i>                  | 1.59 <i>s</i>                  | 1.60 <i>s</i>                  | 1.52 <i>s</i>                  | 1.55 <i>s</i>                  | 1.59 <i>s</i>                  | 1.60 <i>s</i>                  | 1.66 <i>s</i>                  | 1.66 <i>s</i>                      | 1.58 <i>s</i>                              |
| 18   | 1.57 <i>s</i>                  | 1.60 <i>s</i>                  | 1.61 <i>s</i>                  | 1.52 <i>s</i>                  | 1.55 <i>s</i>                  | 1.59 <i>s</i>                  | 1.60 <i>s</i>                  | 1.64 <i>s</i>                  | 1.62 <i>s</i>                      | 1.60 <i>s</i>                              |
| 19   | 1.56 <i>s</i>                  | 1.62 <i>s</i>                  | 1.63 <i>s</i>                  | 1.53 <i>s</i>                  | 1.57 <i>s</i>                  | 4.83-5.01 <i>s</i>             | 1.14 <i>s</i>                  | 1.32 <i>s</i>                  | 1.57 <i>s</i>                      | 1.56 <i>s</i>                              |
| 20   | 1.63 <i>s</i>                  | 2.14 <i>s</i>                  | 2.16 <i>s</i>                  | 2.08 <i>s</i>                  | 1.93 <i>s</i>                  | 1.64 <i>s</i>                  | 1.64 <i>s</i>                  | 1.70 <i>s</i>                  | 1.64 <i>s</i>                      | 1.54 <i>s</i>                              |
| 21   |                                |                                | 3.68 <i>s</i>                  |                                |                                |                                |                                |                                |                                    |                                            |
| Ref. | [1]                            | [2]                            | [3]                            | [3]                            | [3]                            | [4]                            | [4]                            | [5]                            | [7]                                |                                            |

2 <sup>a</sup> Chemical shifts are given in ppm and coupling constants (*J* in parentheses) in Hz; <sup>b</sup> TMS as internal standard.

Table S2 – Cont. <sup>a</sup>

|      | 10 (200 MHz)                       | 11 (200 MHz)                                               |                                            | 12 (400 MHz)                             |                                            | 13 (400 MHz)                       | 14 (500 MHz)                 | 15 (400 MHz)         | 15 (600 MHz)        | 15 (250 MHz)                   |
|------|------------------------------------|------------------------------------------------------------|--------------------------------------------|------------------------------------------|--------------------------------------------|------------------------------------|------------------------------|----------------------|---------------------|--------------------------------|
| H    | CDCl <sub>3</sub> <sup>b</sup>     | CDCl <sub>3</sub> <sup>b</sup>                             | C <sub>6</sub> D <sub>6</sub> <sup>b</sup> | CDCl <sub>3</sub> <sup>b</sup>           | C <sub>6</sub> D <sub>6</sub> <sup>b</sup> | CDCl <sub>3</sub> <sup>b</sup>     | CDCl <sub>3</sub>            | CDCl <sub>3</sub>    | CDCl <sub>3</sub> * | CDCl <sub>3</sub> <sup>b</sup> |
| 1    | 7.34 <i>m</i>                      | 5.58 <i>d</i> (2.4)                                        | 4.70 <i>d</i> (2.5)                        | -                                        | -                                          | 4.16 <i>d</i> (6.8)                | 4.13 <i>d</i> (6.8)          | 4.11 <i>d</i> (6.8)  | 4.13 <i>d</i> (6.5) | 4.15 <i>d</i> (6.5)            |
| 2    | 6.28 <i>m</i>                      | 3.80 <i>t</i> (2.5)<br>2.82 <i>ddd</i> (10.0;<br>5.0; 2.5) | 2.86 <i>m</i><br>2.07 <i>m</i>             | 2.64 <i>d</i> (19)<br>2.75 <i>d</i> (19) | 1.87 <i>d</i> (19)<br>2.24 <i>d</i> (19)   | 5.44 <i>t</i> (6.8)                | 5.39 <i>t</i> (6.8)          | 5.36 <i>t</i> (6.8)  | 5.39 <i>t</i> (6.5) | 5.40 <i>t</i> (6.5)            |
| 3    |                                    |                                                            |                                            |                                          |                                            |                                    |                              |                      |                     |                                |
| 4    | 2.47 <i>t</i> (7.3)                | 1.90-1.78 <i>m</i>                                         | 1.82-1.69 <i>m</i>                         | 1.75-1.90 <i>m</i>                       | 1.18-1.33 <i>m</i>                         | 2.74 <i>d</i> (4.8)                | 2.00 <i>t</i> (7.0)          | 2.04 <i>t</i> (8.0)  | 2.02 <i>m</i>       | 2.04 <i>m</i>                  |
| 5    | 2.24 <i>m</i>                      | 2.28 <i>m</i>                                              | 2.02 <i>m</i>                              | 2.09 <i>m</i>                            | 1.77 <i>m</i>                              | 5.57 <i>dt</i> (15.5; 4.8)         | 1.45 <i>m</i>                | 1.97 <i>dt</i> (8.0) | 2.09 <i>m</i>       | 2.04 <i>m</i>                  |
| 6    | 5.17 <i>t</i> (7.0)                | 5.16 <i>t</i> (6.8)                                        | 5.01 <i>t</i> (7.0)                        | 5.01 <i>t</i> (6.8)                      | 4.93 <i>m</i>                              | 5.61 <i>d</i> (15.5)               | 1.40 <i>m</i>                | 5.08 <i>t</i> (6.4)  | 5.10 <i>t</i> (6.5) | 5.10 <i>t</i> (6.5)            |
| 7    |                                    |                                                            |                                            |                                          |                                            |                                    |                              |                      |                     |                                |
| 8    | 2.03 <i>m</i>                      | 2.03 <i>m</i>                                              | 2.02 <i>m</i>                              | 2.00 <i>m</i>                            | 1.97 <i>m</i>                              | 1.60 <i>m</i>                      | 1.49 <i>t</i> (7.8)          | 2.04 <i>t</i> (8.0)  | 2.02 <i>m</i>       | 2.04 <i>m</i>                  |
| 9    | 2.12 <i>m</i>                      | 2.14 <i>m</i>                                              | 2.12 <i>m</i>                              | 2.09 <i>m</i>                            | 2.09 <i>m</i>                              | 2.15 <i>m</i>                      | 2.07 <i>dt</i> (7.0;<br>7.8) | 1.97 <i>dt</i> (8.0) | 2.09 <i>m</i>       | 2.04 <i>m</i>                  |
| 10   | 5.21 <i>t</i> (7.0)                | 5.21 <i>t</i> (6.8)                                        | 5.22 <i>t</i> (6.7)                        | 5.12 <i>t</i> (6.8)                      | 5.21 <i>t</i> (6.8)                        | 5.27 <i>t</i> (7.0)                | 5.25 <i>t</i> (7.0)          | 5.20 <i>t</i> (6.4)  | 5.22 <i>t</i> (6.5) | 5.21 <i>t</i> (6.5)            |
| 11   |                                    |                                                            |                                            |                                          |                                            |                                    |                              |                      |                     |                                |
| 12   | 2.13 <i>m</i>                      | 2.10 <i>m</i>                                              | 2.24 <i>m</i>                              | 2.07 <i>m</i>                            | 2.21 <i>m</i>                              | 2.12 <i>m</i>                      | 2.11 <i>d</i> (6.9)          | 2.99 <i>br,s</i>     | 3.01 <i>s</i>       | 3.03 <i>s</i>                  |
| 13   | 4.41 <i>ddd</i> (8.3;<br>8.3; 5.0) | 4.40 <i>ddd</i> (8.2;<br>8.2; 8.2; 5.3)                    | 4.45 <i>ddd</i> (8.3;<br>8.3; 5.5)         | 4.33 <i>ddd</i> (8.3;<br>8.3; 5.2)       | 4.46 <i>ddd</i> (8.3;<br>8.3; 5.5)         | 4.43 <i>ddd</i> (8.2; 8.2;<br>5.3) | 4.41 <i>dt</i> (8.2;<br>6.9) |                      |                     |                                |
| 14   | 5.16 <i>d</i> (8.3)                | 5.15 <i>d</i> (8.2)                                        | 5.29 <i>d</i> (8.3)                        | 5.07 <i>d</i> (8.3)                      | 5.31 <i>d</i> (8.3)                        | 5.15 <i>d</i> (8.2)                | 5.13 <i>d</i> (8.2)          |                      | 6.10 <i>s</i>       | 6.10 <i>s</i>                  |
| 15   |                                    |                                                            |                                            |                                          |                                            |                                    |                              |                      |                     |                                |
| 16   | 1.72 <i>s</i>                      | 1.72 <i>s</i>                                              | 1.61 <i>s</i>                              | 1.65 <i>s</i>                            | 1.61 <i>s</i>                              | 1.72 <i>s</i>                      | 1.69 <i>br,s</i>             | 1.55 <i>br,s</i>     | 1.86 <i>s</i>       | 1.87 <i>s</i>                  |
| 17   | 1.69 <i>s</i>                      | 1.69 <i>s</i>                                              | 1.56 <i>s</i>                              | 1.62 <i>s</i>                            | 1.56 <i>s</i>                              | 1.69 <i>s</i>                      | 1.66 <i>br,s</i>             | 1.82 <i>br,s</i>     | 2.12 <i>s</i>       | 2.12 <i>s</i>                  |
| 18   | 1.66 <i>s</i>                      | 1.66 <i>s</i>                                              | 1.59 <i>s</i>                              | 1.59 <i>s</i>                            | 1.59 <i>s</i>                              | 1.67 <i>s</i>                      | 1.65 <i>br,s</i>             | 1.62 <i>br,s</i>     | 1.59 <i>s</i>       | 1.60 <i>s</i>                  |
| 19   | 1.59 <i>s</i>                      | 1.65 <i>s</i>                                              | 1.47 <i>s</i>                              | 1.55 <i>s</i>                            | 1.43 <i>s</i>                              | 1.28 <i>s</i>                      | 1.14 <i>s</i>                | 1.55 <i>br,s</i>     | 1.59 <i>s</i>       | 1.60 <i>s</i>                  |
| 20   | 7.21 <i>s</i>                      |                                                            |                                            | 5.36 <i>s</i>                            | 4.69 <i>s</i>                              | 1.65 <i>s</i>                      | 1.65 <i>br,s</i>             | 1.55 <i>br,s</i>     | 1.66 <i>s</i>       | 1.66 <i>s</i>                  |
| 21   |                                    |                                                            |                                            |                                          |                                            |                                    |                              |                      |                     |                                |
| Ref. | [7]                                | [7]                                                        |                                            | [8]                                      |                                            | [9]                                | [10]                         | [11]                 | [13]                | [8]                            |

4 <sup>a</sup> Chemical shifts are given in ppm and coupling constants (*J* in parentheses) in Hz; <sup>b</sup> TMS as internal standard.

Table S2 – Cont. <sup>a</sup>

| H    | 15 (400 MHz)                   |                     | 17                       | 18 (250 MHz)              | 19 (500 MHz)        | 20 (500 MHz)                     | 21 (400 MHz)                   |                                            | 22 (400 MHz)                   |                                            | 23 (400 MHz)        |
|------|--------------------------------|---------------------|--------------------------|---------------------------|---------------------|----------------------------------|--------------------------------|--------------------------------------------|--------------------------------|--------------------------------------------|---------------------|
|      | CDCl <sub>3</sub> <sup>b</sup> | CDCl <sub>3</sub>   |                          | CD <sub>3</sub> OD        | CDCl <sub>3</sub>   | CDCl <sub>3</sub>                | CDCl <sub>3</sub> <sup>b</sup> | C <sub>6</sub> D <sub>6</sub> <sup>b</sup> | CDCl <sub>3</sub> <sup>b</sup> | C <sub>6</sub> D <sub>6</sub> <sup>b</sup> | CDCl <sub>3</sub>   |
| 1    | 4.13 <i>d</i> (6.5)            | 4.09 <i>d</i> (6.8) | 4.08 <i>d</i> (6.7)      | 7.32 <i>t</i> (1.7)       |                     | 5.57 <i>d</i> (2.2)              | 4.15 <i>d</i> (6.5)            | 4.02 <i>d</i> (6.5)                        | 4.58 <i>d</i> (6.5)            | 4.59 <i>d</i> (6.5)                        | 9.92 <i>d</i> (8.0) |
| 2    | 5.39 <i>t</i> (6.5)            | 5.35 <i>t</i> (6.8) | 5.42 <i>t</i> (6.7)      | 6.24 <i>d</i> (1.1)       | 5.96 <i>s</i>       | 3.78 <i>t</i> (2.4)              | 5.41 <i>t</i> (6.5)            | 5.40 <i>t</i> (6.5)                        | 5.34 <i>t</i> (6.5)            | 5.39 <i>t</i> (6.5)                        | 5.87 <i>d</i> (8.0) |
| 3    |                                |                     | 1.62                     |                           |                     | 2.80 <i>ddd</i> (2.5; 4.8; 10.1) |                                |                                            |                                |                                            |                     |
| 4    | 2.02 <i>m</i>                  | 1.99 <i>m</i>       | 2.72 <i>d</i>            | 2.40 <i>t</i> (7.4)       | 2.42, 2.53 <i>m</i> | 1.76, 1.88 <i>m</i>              | 1.98 <i>m</i>                  | 2.00 <i>m</i>                              | 2.05 <i>m</i>                  | 1.91 <i>t</i> (8.0)                        | 2.22 <i>m</i>       |
| 5    | 2.09 <i>m</i>                  | 2.06 <i>m</i>       | 5.17 <i>m</i>            | 2.20 <i>q</i> (7.4)       | 2.32 <i>m</i>       | 2.26 <i>m</i>                    | 2.10 <i>m</i>                  | 2.12 <i>m</i>                              | 2.10 <i>m</i>                  | 2.00 <i>m</i>                              | 2.21 <i>m</i>       |
| 6    | 5.10 <i>t</i> (6.5)            | 5.06 <i>t</i> (6.7) | 5.44 <i>d</i> (15.6)     | 5.14 <i>dt</i> (1.2; 7.1) | 5.10 <i>t</i> (7)   | 5.15 <i>t</i> (7)                | 5.11 <i>t</i> (6.5)            | 5.21 <i>t</i> (6.5)                        | 5.12 <i>t</i> (7.5)            | 5.06 <i>t</i> (8.0)                        | 5.09 <i>t</i> (6.2) |
| 7    |                                |                     | 1.27 <i>s</i>            |                           |                     |                                  |                                |                                            |                                |                                            |                     |
| 8    | 2.02 <i>m</i>                  | 1.98 <i>m</i>       | 3.55 <i>dd</i> (6.7, 12) | 2.09 <i>t</i> (6.5)       | 2.14 <i>t</i> (7)   | 2.15 <i>t</i> (8)                | 1.98 <i>m</i>                  | 2.03 <i>m</i>                              | 2.29 <i>t</i> (7.5)            | 2.35 <i>t</i> (7.5)                        | 2.02 <i>m</i>       |
| 9    | 2.09 <i>m</i>                  | 2.08 <i>m</i>       | 2.11                     | 2.01 <i>q</i> (6.5)       | 2.04 <i>q</i> (7.5) | 2.03 <i>q</i> (8)                | 2.10 <i>m</i>                  | 2.11 <i>m</i>                              | 2.82 <i>t</i> (7.5)            | 2.62 <i>t</i> (7.5)                        | 2.12 <i>m</i>       |
| 10   | 5.22 <i>t</i> (6.5)            | 5.19 <i>t</i> (6.8) |                          | 5.22 <i>dt</i> (1.2; 6.9) | 5.12 <i>t</i> (7)   | 5.20 <i>t</i> (7)                | 5.23 <i>t</i> (6.5)            | 5.21 <i>t</i> (6.5)                        |                                |                                            | 5.22 <i>t</i> (6.2) |
| 11   |                                |                     | 1.62                     |                           |                     |                                  |                                |                                            |                                |                                            |                     |
| 12   | 3.01 <i>s</i>                  | 2.97 <i>s</i>       | 2.98 <i>s</i>            | 2.99 <i>s</i>             | 3.03 <i>s</i>       | 3.02 <i>s</i>                    | 3.01 <i>s</i>                  | 2.81 <i>s</i>                              | 3.40 <i>s</i>                  | 3.27 <i>s</i>                              | 3.03 <i>s</i>       |
| 13   |                                |                     |                          |                           |                     |                                  |                                |                                            |                                |                                            |                     |
| 14   | 6.10 <i>s</i>                  | 6.06 <i>s</i>       | 6.09 <i>s</i>            | 6.14 <i>t</i> (1.3)       | 6.09 <i>s</i>       | 6.09 <i>s</i>                    | 2.26 <i>d</i> (6.5)            | 2.01 <i>d</i> (6.5)                        | 6.12 <i>s</i>                  | 5.88 <i>s</i>                              | 6.10 <i>s</i>       |
| 15   | -                              |                     | 2.11                     |                           |                     |                                  | 2.07 <i>m</i>                  | 2.11 <i>m</i>                              |                                |                                            |                     |
| 16   | 1.86 <i>s</i>                  | 1.82 <i>s</i>       | 1.87 <i>s</i>            | 1.85 <i>d</i> (1.2)       | 1.86 <i>s</i>       | 1.86 <i>s</i>                    | 0.87 <i>d</i> (7.0)            | 0.82 <i>d</i> (7.0)                        | 1.89 <i>s</i>                  | 1.43 <i>s</i>                              | 1.88 <i>s</i>       |
| 17   | 2.12 <i>s</i>                  | 2.11 <i>s</i>       |                          | 2.08 <i>d</i> (1.1)       | 2.12 <i>s</i>       | 2.12 <i>s</i>                    | 0.87 <i>d</i> (7.0)            | 0.82 <i>d</i> (7.0)                        | 2.12 <i>s</i>                  | 2.04 <i>s</i>                              | 2.14 <i>s</i>       |
| 18   | 1.59 <i>s</i>                  | 1.56 <i>s</i>       |                          | 1.65 <i>s</i>             | 1.61 <i>s</i>       | 1.61 <i>s</i>                    | 1.60 <i>s</i>                  | 1.60 <i>s</i>                              | 5.84 <i>s</i><br>6.18 <i>s</i> | 5.39 <i>s</i><br>5.70 <i>s</i>             | 1.61 <i>s</i>       |
| 19   | 1.59 <i>s</i>                  | 1.55 <i>s</i>       |                          | 1.65 <i>s</i>             | 1.61 <i>s</i>       | 1.61 <i>s</i>                    | 1.60 <i>s</i>                  | 1.54 <i>s</i>                              | 1.62 <i>s</i>                  | 1.43 <i>s</i>                              | 1.61 <i>s</i>       |
| 20   | 1.66 <i>s</i>                  | 1.61 <i>s</i>       |                          | 7.19 <i>t</i> (1.7)       | 5.81 <i>s</i>       |                                  | 1.65 <i>s</i>                  | 1.49 <i>s</i>                              | 1.70 <i>s</i>                  | 1.49 <i>s</i>                              | 2.17 <i>s</i>       |
| 22   |                                |                     |                          |                           |                     |                                  |                                |                                            | 2.07 <i>s</i>                  | 1.70 <i>s</i>                              |                     |
| Ref. | [8]                            | [17]                | [12]                     |                           | [18]                |                                  | [8]                            |                                            | [8]                            |                                            | [17]                |

6 <sup>a</sup> Chemical shifts are given in ppm and coupling constants (*J* in parentheses) in Hz; <sup>b</sup> TMS as internal standard.



Table S2 – Cont. <sup>a</sup>

|      | 25 (270 MHz)                   | 25 (400 MHz)                         | 26 (400 MHz)                   | 27 (400 MHz)                                                         | 28 (400 MHz)                         | 29 (400 MHz)                         | 30 (400 MHz)                   | 31 (600 MHz)        | 32 (600 MHz)                 | 33 (600 MHz)        |
|------|--------------------------------|--------------------------------------|--------------------------------|----------------------------------------------------------------------|--------------------------------------|--------------------------------------|--------------------------------|---------------------|------------------------------|---------------------|
| H    | CDCl <sub>3</sub> <sup>b</sup> | CDCl <sub>3</sub> <sup>b</sup>       | CDCl <sub>3</sub> <sup>b</sup> | CDCl <sub>3</sub> <sup>b</sup>                                       | CDCl <sub>3</sub> <sup>b</sup>       | CDCl <sub>3</sub> <sup>b</sup>       | CDCl <sub>3</sub> <sup>b</sup> | CDCl <sub>3</sub>   | CDCl <sub>3</sub>            | CDCl <sub>3</sub>   |
| 1    | 4.12 <i>d</i> (6.5)            | 4.15 <i>d</i> (6.8)                  | 4.15 <i>d</i> (6.8)            | a: 3.69 <i>dd</i><br>(11.2; 2.7)<br>b: 3.53 <i>dd</i><br>(11.2; 2.7) | 4.14 <i>d</i> (6.8)                  | 4.11 <i>d</i> (6.7)                  | 4.15 <i>d</i> (6.8)            |                     |                              |                     |
| 2    | 5.36 <i>t</i> (6.5)            | 5.40 <i>t</i> (6.8)                  | 5.41 <i>t</i> (6.8)            | 4.20 <i>dd</i> (7.3;<br>2.7)                                         | 5.43 <i>t</i> (6.8)                  | 5.40 <i>t</i> (6.7)                  | 5.43 <i>t</i> (6.8)            | 5.71 <i>s</i>       | 5.86 <i>quintet</i><br>(1.6) | 5.70 <i>s</i>       |
| 3    |                                |                                      |                                |                                                                      |                                      |                                      |                                |                     |                              |                     |
| 4    | 2.29 <i>t</i> (7.0)            | 2.33 <i>t</i> (7.0)                  | 2.04 <i>m</i>                  | 2.01 <i>m</i>                                                        | 2.05-2.11 <i>m</i>                   | 2.08-2.11 <i>m</i>                   | 2.73 <i>d</i> (5.2)            | 2.19 <i>m</i>       | 2.48 <i>t</i> (7.3)          | 2.20 <i>m</i>       |
| 5    | 2.84 <i>t</i> (7.0)            | 2.81 <i>t</i> (7.0)                  | 2.12 <i>m</i>                  | 2.17 <i>m</i>                                                        | 1.66 <i>m</i>                        | 1.61-1.63 <i>m</i>                   | 5.57 <i>dt</i> (15.4;<br>5.2)  | 2.19 <i>m</i>       | 2.32 <i>m</i>                | 2.20 <i>m</i>       |
| 6    |                                |                                      | 5.11 <i>t</i> (6.8)            | 5.12 <i>t</i> (7.0)                                                  | 4.06 <i>t</i> (6.4)                  | 4.03 <i>t</i> (6.3)                  | 5.62 <i>d</i> (15.4)           | 5.11 <i>t</i> (6.0) | 5.10 <i>dt</i> (1.2;<br>6.8) | 5.10 <i>t</i> (6.1) |
| 7    |                                |                                      |                                |                                                                      |                                      |                                      |                                |                     |                              |                     |
| 8    | 2.24 <i>m</i>                  | 2.31 <i>t</i> (7.0)                  | 2.02 <i>m</i>                  | 2.02 <i>m</i>                                                        | 2.06-2.18 <i>m</i>                   | 2.11-2.14 <i>m</i>                   | 1.61 <i>m</i>                  | 2.04 <i>t</i> (7.8) | 2.05 <i>t</i> (7.1)          | 2.04 <i>t</i> (7.0) |
| 9    | 2.15 <i>m</i>                  | 2.17 <i>m</i>                        | 2.14 <i>m</i>                  | 2.13 <i>m</i>                                                        | 2.21 <i>m</i>                        | 2.24 <i>m</i>                        | 2.16 <i>m</i>                  | 2.15 <i>m</i>       | 2.16 <i>d</i> (0.9)          | 2.14 <i>m</i>       |
| 10   | 5.18 <i>t</i> (6.5)            | 5.22 <i>t</i> (6.8)                  | 5.26 <i>t</i> (7.0)            | 5.22 <i>t</i> (7.0)                                                  | 5.24 <i>t</i> (6.5)                  | 5.22 <i>t</i> (6.3)                  | 5.25 <i>t</i> (6.8)            | 5.24 <i>t</i> (6.8) | 5.22 <i>dt</i> (0.9;<br>7.1) | 5.24 <i>t</i> (6.3) |
| 11   |                                |                                      |                                |                                                                      |                                      |                                      |                                |                     |                              |                     |
| 12   | 3.01 <i>s</i>                  | 3.03 <i>s</i>                        | 3.03 <i>s</i>                  | 3.02 <i>s</i>                                                        | 3.02 <i>s</i>                        | 3.01 <i>s</i>                        | 3.03 <i>s</i>                  | 3.05 <i>s</i>       | 3.06 <i>s</i>                | 3.03 <i>s</i>       |
| 13   |                                |                                      |                                |                                                                      |                                      |                                      |                                |                     |                              |                     |
| 14   | 6.30 <i>s</i>                  | 6.10 <i>s</i>                        | 2.61 <i>s</i>                  | 6.10 <i>s</i>                                                        | 2.27 <i>d</i> (6.7)                  | 6.07 <i>s</i>                        | 6.09 <i>s</i>                  | 6.12 <i>s</i>       | 6.12 <i>m</i>                | 2.30 <i>d</i> (6.9) |
| 15   |                                |                                      |                                |                                                                      | 2.11 <i>m</i>                        |                                      |                                |                     |                              | 2.13 <i>m</i>       |
| 16   | 1.88 <i>s</i>                  | 1.88 <i>s</i>                        | 1.23 <i>s</i>                  | 1.87 <i>s</i>                                                        | 0.89 <i>d</i> (6.5)                  | 1.84 <i>s</i>                        | 2.13 <i>s</i>                  | 1.89 <i>s</i>       | 1.89 <i>d</i> (0.9)          | 0.91 <i>d</i> (6.7) |
| 17   | 2.12 <i>s</i>                  | 2.14 <i>s</i>                        | 1.23 <i>s</i>                  | 2.13 <i>s</i>                                                        | 0.89 <i>d</i> (6.5)                  | 2.10 <i>s</i>                        | 1.87 <i>s</i>                  | 2.16 <i>s</i>       | 2.16 <i>d</i> (0.8)          | 0.91 <i>d</i> (6.7) |
| 18   | 1.59 <i>s</i>                  | 1.60 <i>s</i>                        | 1.62 <i>s</i>                  | 1.61 <i>s</i>                                                        | 1.60 <i>s</i>                        | 1.59 <i>s</i>                        | 1.60 <i>s</i>                  | 1.63 <i>s</i>       | 1.64 <i>s</i>                | 1.62 <i>s</i>       |
| 19   | 5.70 <i>s</i><br>5.96 <i>s</i> | a: 6.00 <i>s</i><br>b: 5.74 <i>s</i> | 1.60 <i>s</i>                  | 1.61 <i>s</i>                                                        | a: 5.05 <i>s</i><br>b: 4.87 <i>s</i> | a: 5.02 <i>s</i><br>b: 4.84 <i>s</i> | 1.28 <i>s</i>                  | 1.63 <i>s</i>       | 1.63 <i>s</i>                | 1.62 <i>s</i>       |
| 20   | 1.67 <i>s</i>                  | 1.69 <i>s</i>                        | 1.68 <i>s</i>                  | a: 5.14 <i>s</i><br>b: 4.97 <i>s</i>                                 | 1.67 <i>s</i>                        | 1.65 <i>s</i>                        | 1.66 <i>s</i>                  | 2.18 <i>s</i>       | 4.75 <i>d</i> (1.6)          | 2.18 <i>s</i>       |
| 21   |                                |                                      |                                |                                                                      |                                      |                                      |                                |                     |                              |                     |
| Ref. | [8]                            | [9]                                  | [9]                            | [9]                                                                  | [9]                                  | [9]                                  | [9]                            | [13]                | [13]                         | [13]                |

8 <sup>a</sup> Chemical shifts are given in ppm and coupling constants (*J* in parentheses) in Hz; <sup>b</sup> TMS as internal standard.

Table S2 – Cont. <sup>a</sup>

|             | 34 (600 MHz)        | 35 (600 MHz)        | 36 (600 MHz)        | 40 (360 MHz)                   | 40 (400 MHz)                   | 41 (400 MHz)                   | 42 (200 MHz)                   | 43 (400 MHz)                   | 44 (600 MHz)        |
|-------------|---------------------|---------------------|---------------------|--------------------------------|--------------------------------|--------------------------------|--------------------------------|--------------------------------|---------------------|
| H           | CDCl <sub>3</sub>   | CDCl <sub>3</sub>   | CDCl <sub>3</sub>   | CDCl <sub>3</sub> <sup>b</sup> | CDCl <sub>3</sub> <sup>b</sup> | CDCl <sub>3</sub> <sup>b</sup> | CDCl <sub>3</sub> <sup>b</sup> | CDCl <sub>3</sub> <sup>b</sup> | CDCl <sub>3</sub>   |
| <b>1</b>    | 4.18 <i>s</i> (6.5) | 4.70 <i>d</i> (7.2) | 7.36 <i>t</i> (1.5) | 4.10 <i>d</i> (6.8)            | 4.10 <i>d</i> (6.8)            | 4.15 <i>d</i> (6.8)            | 4.15 <i>d</i> (7.0)            | 4.15 <i>d</i> (6.8)            | 4.17 <i>d</i> (6.8) |
| <b>2</b>    | 5.44 <i>t</i> (6.5) | 5.38 <i>t</i> (7.2) | 6.30 <i>s</i>       | 5.37 <i>t</i> (6.8)            | 5.37 <i>t</i> (6.8)            | 5.42 <i>t</i> (6.8)            | 5.42 <i>t</i> (7.0)            | 5.41 <i>t</i> (7.0)            | 5.44 <i>t</i> (6.8) |
| <b>3</b>    |                     |                     |                     |                                |                                |                                |                                |                                |                     |
| <b>4</b>    | 2.05 <i>m</i>       | 2.07 <i>m</i>       | 2.47 <i>t</i> (7.6) | 2.00 <i>m</i>                  | 2.0 <i>m</i>                   | 2.00 <i>m</i>                  | 2.00-2.20 <i>m</i>             | 2.02 <i>d</i> (6.5)            | 2.07 <i>m</i>       |
| <b>5</b>    | 2.14 <i>m</i>       | 2.13 <i>m</i>       | 2.26 <i>q</i> (7.5) | 2.07 <i>m</i>                  | 2.07 <i>m</i>                  | 2.07 <i>m</i>                  | 2.00-2.20 <i>m</i>             | 1.45-1.50 <i>m</i>             | 2.14 <i>m</i>       |
| <b>6</b>    | 5.14 <i>t</i> (6.3) | 5.12 <i>t</i> (6.8) | 5.19 <i>t</i> (7.0) | 5.09 <i>t</i> (6.8)            | 5.09 <i>t</i> (6.8)            | 5.11 <i>t</i> (6.8)            | 5.15 <i>t</i> (7.0)            | 1.45-1.50 <i>m</i>             | 5.13 <i>t</i> (6.8) |
| <b>7</b>    |                     |                     |                     |                                |                                |                                |                                |                                |                     |
| <b>8</b>    | 2.04 <i>m</i>       | 2.3 <i>t</i> (7.2)  | 2.04 <i>t</i> (7.6) | 2.00 <i>m</i>                  | 2.0 <i>m</i>                   | 2.00 <i>m</i>                  | 2.75 <i>d</i> (7.0)            | 1.68 <i>m</i><br>1.80 <i>m</i> | 2.05 <i>s</i>       |
| <b>9</b>    | 1.59 <i>m</i>       | 2.13 <i>m</i>       | 2.13 <i>q</i> (7.6) | 2.07 <i>m</i>                  | 2.07 <i>m</i>                  | 2.07 <i>m</i>                  | 5.51 <i>dt</i> (15.0;<br>70)   | 1.78 <i>m</i><br>1.91 <i>m</i> | 2.14 <i>m</i>       |
| <b>10</b>   | 2.20 <i>m</i>       | 5.26 <i>t</i> (6.8) | 5.23 <i>t</i> (6.8) | 5.13 <i>t</i> (6.8)            | 5.13 <i>t</i> (6.8)            | 5.13 <i>t</i> (6.8)            | 6.05 <i>d</i> (15.0)           | 4.25 <i>t</i> (7.0)            | 5.13 <i>t</i> (6.8) |
| <b>11</b>   |                     |                     |                     |                                |                                |                                |                                |                                |                     |
| <b>12</b>   | 6.04 <i>s</i>       | 3.05 <i>s</i>       | 3.25 <i>s</i>       | 2.72 <i>d</i> (7.2)            | 2.72 <i>d</i> (7.2)            | 2.67 <i>d</i> (5.6)            | 5.35 <i>t</i> (7.0)            | 5.41 <i>t</i> (7.0)            | 2.04 <i>s</i>       |
| <b>13</b>   |                     |                     |                     | 5.58 <i>dt</i> (7.2;<br>15.6)  | 5.58 <i>dt</i> (15.6;<br>7.2)  | 5.57 <i>dt</i> (15.6;<br>5.6)  | 2.81 <i>t</i> (7.0)            | 2.71 <i>t</i> (7.0)            | 2.14 <i>m</i>       |
| <b>14</b>   | 6.09 <i>s</i>       | 6.13 <i>s</i>       | 5.89 <i>s</i>       | 6.10 <i>d</i> (15.6)           | 6.10 <i>d</i> (15.6)           | 5.63 <i>d</i> (15.6)           | 5.11 <i>t</i> (7.0)            | 5.10 <i>t</i> (7.0)            | 5.41 <i>t</i> (6.9) |
| <b>15</b>   |                     |                     |                     |                                |                                |                                |                                |                                |                     |
| <b>16</b>   | 1.89 <i>s</i>       | 1.89 <i>s</i>       | 7.09 <i>s</i>       | 4.84 <i>s</i>                  | 1.81 <i>s</i>                  | 1.32 <i>s</i>                  | 1.68 <i>s</i>                  | 1.68 <i>s</i>                  | 4.01 <i>s</i>       |
| <b>17</b>   | 2.16 <i>s</i>       | 2.16 <i>s</i>       | 2.00 <i>s</i>       | 1.81 <i>s</i>                  | 4.84 <i>s</i>                  | 1.32 <i>s</i>                  | 1.64 <i>s</i>                  | 1.62 <i>s</i>                  | 1.68 <i>s</i>       |
| <b>18</b>   | 2.19 <i>s</i>       | 1.63 <i>s</i>       | 1.61 <i>s</i>       | 1.57 <i>s</i>                  | 1.57 <i>s</i>                  | 1.57 <i>s</i>                  | 1.75 <i>s</i>                  | 1.62 <i>s</i>                  | 1.62 <i>s</i>       |
| <b>19</b>   | 1.62 <i>s</i>       | 1.62 <i>s</i>       | 1.62 <i>s</i>       | 1.58 <i>s</i>                  | 1.58 <i>s</i>                  | 1.60 <i>s</i>                  | 1.59 <i>s</i>                  | 1.22 <i>s</i>                  | 1.62 <i>s</i>       |
| <b>20</b>   | 1.62 <i>s</i>       | 1.74 <i>s</i>       | 7.23 <i>s</i>       | 1.65 <i>s</i>                  | 1.65 <i>s</i>                  | 1.68 <i>s</i>                  | 1.68 <i>s</i>                  | 1.67 <i>s</i>                  | 1.70 <i>s</i>       |
| <b>21</b>   |                     | 8.09 <i>s</i>       |                     |                                |                                |                                |                                |                                |                     |
| <b>Ref.</b> | [13]                | [14]                | [14]                | [2]                            | [16]                           | [16]                           | [3]                            | [5]                            | [14]                |

10 <sup>a</sup> Chemical shifts are given in ppm and coupling constants (*J* in parentheses) in Hz; <sup>b</sup> TMS as internal standard.

**Table S3** – <sup>13</sup>C NMR spectral data of linear diterpenes identified in *B. bifurcata*. <sup>a, b, c</sup>

|      | 1 (90.5 MHz)                   | 2 (50 MHz)                     | 3 (50 MHz)                     | 4 (50 MHz)                     | 5 (50 MHz)                     | 6 (100 MHz)                    | 7 (100 MHz)                    | 8 (62.5 MHz)                   | 9                              | 9 (90 MHz)                     |
|------|--------------------------------|--------------------------------|--------------------------------|--------------------------------|--------------------------------|--------------------------------|--------------------------------|--------------------------------|--------------------------------|--------------------------------|
| C    | CDCl <sub>3</sub> <sup>b</sup> | CDCl <sub>3</sub> <sup>b</sup> | CDCl <sub>3</sub> <sup>b</sup> | CDCl <sub>3</sub> <sup>b</sup> | CDCl <sub>3</sub> <sup>b</sup> | CDCl <sub>3</sub> <sup>b</sup> | CDCl <sub>3</sub> <sup>b</sup> | CDCl <sub>3</sub> <sup>b</sup> | CDCl <sub>3</sub> <sup>b</sup> | CDCl <sub>3</sub> <sup>b</sup> |
| 1    | 59.21 <i>t</i> (106)           | 171.3 <i>s</i>                 | 167.2 - C                      | 191.3 - CH                     | 190.9 - CH                     | 59.2 - CH <sub>2</sub>         | 59.2 - CH <sub>2</sub>         | 59.4 <i>t</i>                  | 59.3                           | 59.3 - CH <sub>2</sub>         |
| 2    | 123.53 <i>d</i> (153)          | 115.2 <i>d</i>                 | 115.3 - CH                     | 127.4 - CH                     | 128.6 - CH                     | 123.7 - CH                     | 123.6 - CH                     | 124.2 <i>d</i>                 | 123.6                          | 124.3 - CH                     |
| 3    | 139.09 <i>s</i>                | 162.4 <i>s</i>                 | 159.9 - C                      | 163.9 - C                      | 164.0 - C                      | 139.1 - C                      | 139.4 - C                      | 138.4 <i>s</i>                 | 135.0                          | 139.4 - C                      |
| 4    | 39.40 <i>t</i> (94)            | 41.1 <i>t</i>                  | 40.8 - CH <sub>2</sub>         | 40.5 - CH <sub>2</sub>         | 34.1 - CH <sub>2</sub>         | 35.5 - CH <sub>2</sub>         | 39.8 - CH <sub>2</sub>         | 42.3 <i>t</i>                  | 39.5                           | 39.5 - CH <sub>2</sub>         |
| 5    | 26.71 <i>t</i> (92)            | 26.1 <i>t</i> (4.5)            | 26.1 - CH <sub>2</sub>         | 26.0 - CH <sub>2</sub>         | 26.8 - CH <sub>2</sub>         | 33.3 - CH <sub>2</sub>         | 21.9 - CH <sub>2</sub>         | 125.3 <i>d</i>                 | 25.7                           | 25.8 - CH <sub>2</sub>         |
| 6    | 123.98 <i>d</i> (150)          | 122.9 <i>d</i> (4.5)           | 123.0 - CH                     | 122.6 - CH                     | 122.2 - CH                     | 74.9 - CH                      | 41.4 - CH <sub>2</sub>         | 138.8 <i>d</i>                 | 124.3                          | 123.6 - CH                     |
| 7    | 134.89 <i>s</i>                | 136.0 <i>s</i>                 | 135.9 - C                      | 136.3 - C                      | 137.0 - C                      | 151.3 - C                      | 72.8 - C                       | 72.9 <i>s</i>                  | 134.7                          | 134.8 - C                      |
| 8    | 39.18 <i>t</i> (94)            | 39.2 <i>t</i>                  | 39.2 - CH <sub>2</sub>         | 39.2 - CH <sub>2</sub>         | 39.1 - CH <sub>2</sub>         | 30.9 - CH <sub>2</sub>         | 41.2 - CH <sub>2</sub>         | 42.2 <i>t</i>                  | 39.4                           | 39.4 - CH <sub>2</sub>         |
| 9    | 26.00 <i>t</i> (94)            | 25.9 <i>t</i>                  | 25.9 - CH <sub>2</sub>         | 25.8 - CH <sub>2</sub>         | 25.8 - CH <sub>2</sub>         | 26.1 - CH                      | 22.1 - CH <sub>2</sub>         | 22.5 <i>t</i>                  | 26.2                           | 26.2 - CH <sub>2</sub>         |
| 10   | 125.80 <i>d</i> (151)          | 125.9 <i>d</i> (6.8)           | 125.8 - CH                     | 125.6 - CH                     | 125.5 - CH                     | 125.6 - CH                     | 126.1 - CH                     | 126.1 <i>d</i>                 | 127.5                          | 127.4 - CH                     |
| 11   | 136.71 <i>s</i>                | 136.7 <i>s</i>                 | 136.9 - C                      | 136.9 - C                      | 137.0 - C                      | 137.1 - C                      | 136.9 - C                      | 137.0 <i>s</i>                 | 131.6                          | 131.6 - C                      |
| 12   | 77.14 <i>d</i> (109)           | 77.3 <i>d</i> (6.7)            | 77.2 - CH                      | 77.1 - CH                      | 77.1 - CH                      | 77.1 - CH                      | 77.1 - CH                      | 77.1 <i>t</i>                  | 48.2                           | 48.2 - CH <sub>2</sub>         |
| 13   | 34.17 <i>t</i> (96)            | 34.2 <i>t</i> (6.7; 7)         | 34.2 - CH <sub>2</sub>         | 34.2 - CH <sub>2</sub>         | 32.3 - CH <sub>2</sub>         | 34.1 - CH <sub>2</sub>         | 34.2 - CH <sub>2</sub>         | 34.2 <i>t</i>                  | 65.8                           | 65.6 - CH                      |
| 14   | 120.23 <i>d</i> (151)          | 120.2 <i>d</i> (7)             | 120.3 - CH                     | 120.3 - CH                     | 120.4 - CH                     | 120.1 - CH                     | 120.1 - CH                     | 120.1 <i>d</i>                 | 128.4                          | 128.5 - CH                     |
| 15   | 134.20 <i>s</i>                | 134.4 <i>s</i>                 | 134.1 - C                      | 134.3 - C                      | 134.1 - C                      | 134.6 - C                      | 134.7 - C                      | 134.9 <i>s</i>                 | 139.3                          | 135.0 - C                      |
| 16   | 25.76 <i>q</i> (70)            | 25.8 <i>q</i>                  | 25.8 - CH <sub>3</sub>         | 25.6 - CH <sub>3</sub>         | 25.0 - CH <sub>3</sub>         | 25.8 - CH <sub>3</sub>         | 25.9 - CH <sub>3</sub>         | 25.9 <i>q</i>                  | 26.4                           | 26.4 - CH <sub>3</sub>         |
| 17   | 17.89 <i>q</i> (95)            | 17.9 <i>q</i>                  | 17.9 - CH <sub>3</sub>         | 17.5 - CH <sub>3</sub>         | 17.9 - CH <sub>3</sub>         | 17.9 - CH <sub>3</sub>         | 18.0 - CH <sub>3</sub>         | 18.0 <i>q</i>                  | 15.9                           | 18.2 - CH <sub>3</sub>         |
| 18   | 11.63 <i>q</i> (92)            | 19.1 <i>q</i>                  | 11.5 - CH <sub>3</sub>         | 11.6 - CH <sub>3</sub>         | 11.6 - CH <sub>3</sub>         | 11.7 - CH <sub>3</sub>         | 11.7 - CH <sub>3</sub>         | 11.7 <i>q</i>                  | 16.2                           | 16.3 - CH <sub>3</sub>         |
| 19   | 15.92 <i>q</i> (96)            | 16.0 <i>q</i>                  | 15.9 - CH <sub>3</sub>         | 16.0 - CH <sub>3</sub>         | 16.0 - CH <sub>3</sub>         | 109.9 - CH <sub>3</sub>        | 26.7 - CH <sub>3</sub>         | 28.2 <i>q</i>                  | 16.3                           | 15.9 - CH <sub>3</sub>         |
| 20   | 16.17 <i>q</i> (96)            | 11.6 <i>q</i>                  | 18.7 - CH <sub>3</sub>         | 17.9 - CH <sub>3</sub>         | 25.8 - CH <sub>3</sub>         | 16.2 - CH <sub>3</sub>         | 16.1 - CH <sub>3</sub>         | 16.4 <i>q</i>                  | 18.2                           | 16.2 - CH <sub>3</sub>         |
| 21   |                                |                                | 50.7 - CH <sub>3</sub>         |                                |                                |                                |                                |                                |                                |                                |
| 22   |                                |                                |                                |                                |                                |                                |                                |                                |                                |                                |
| Ref. | [1]                            | [2]                            | [3]                            | [3]                            | [3]                            | [4]                            | [4]                            | [5]                            | [6]                            | [7]                            |

<sup>a</sup> Chemical shifts are given in ppm and coupling constants (*J* in parentheses) in Hz; <sup>b</sup> TMS as internal standard; <sup>c</sup> Multiplicities were obtained with DEPT sequences.

Table S3 – Cont. <sup>a, b, c</sup>

|      | 9 (50 MHz)                                 | 10 (50 MHz)                    | 11 (50 MHz)                    |                                            | 12 (100 MHz)                   |                                            | 13 (100 MHz)                   | 14 (500 MHz)           | 15 (100, 25, 18 MHz) |
|------|--------------------------------------------|--------------------------------|--------------------------------|--------------------------------------------|--------------------------------|--------------------------------------------|--------------------------------|------------------------|----------------------|
| C    | C <sub>6</sub> D <sub>6</sub> <sup>b</sup> | CDCl <sub>3</sub> <sup>b</sup> | CDCl <sub>3</sub> <sup>b</sup> | C <sub>6</sub> D <sub>6</sub> <sup>b</sup> | CDCl <sub>3</sub> <sup>b</sup> | C <sub>6</sub> D <sub>6</sub> <sup>b</sup> | CDCl <sub>3</sub> <sup>b</sup> | CDCl <sub>3</sub>      | CDCl <sub>3</sub>    |
| 1    | 59.3 – CH <sub>2</sub>                     | 142.5 – CH                     | 77.6 – CH                      | 78.2 – CH                                  | 173.5 – C                      | 173.0 – C                                  | 59.4 <i>t</i>                  | 59.3 – CH <sub>2</sub> | 58.8                 |
| 2    | 125.3 – CH                                 | 111.1 – CH                     | 53.7 – CH                      | 54.3 – CH                                  | 36.1 – CH <sub>2</sub>         | 35.7 – CH <sub>2</sub>                     | 124.3 <i>d</i>                 | 123.6 – CH             | 124.5                |
| 3    | 137.6 – C                                  | 125.0 – C                      | 43.1 – CH                      | 43.8 – CH                                  | 62.3 – C                       | 61.8 – C                                   | 138.3 <i>s</i>                 | 139.5 – C              | 137.6                |
| 4    | 39.9 – CH <sub>2</sub>                     | 25.0 – CH <sub>2</sub>         | 26.8 – CH <sub>2</sub>         | 27.9 – CH <sub>2</sub>                     | 29.5 – CH <sub>2</sub>         | 29.3 – CH <sub>2</sub>                     | 42.3 <i>t</i>                  | 39.9 – CH <sub>2</sub> | 39.6                 |
| 5    | 26.7 – CH <sub>2</sub>                     | 28.4 – CH <sub>2</sub>         | 25.8 – CH <sub>2</sub>         | 26.7 – CH <sub>2</sub>                     | 23.1 – CH <sub>2</sub>         | 23.1 – CH <sub>2</sub>                     | 125.2 <i>d</i>                 | 22.0 – CH <sub>2</sub> | 26.5                 |
| 6    | 124.9 – CH                                 | 124.2 – CH                     | 123.0 – CH                     | 124.5 – CH                                 | 122.5 – CH                     | 123.4 – CH                                 | 138.9 <i>d</i>                 | 41.7 – CH <sub>2</sub> | 124.4                |
| 7    | 134.9 – C                                  | 134.9 – C                      | 134.9 – C                      | 134.5 – C                                  | 136.9 – C                      | 136.4 – C                                  | 73.0 <i>s</i>                  | 72.7 – C               | 134.6                |
| 8    | 39.8 – CH <sub>2</sub>                     | 39.5 – CH <sub>2</sub>         | 39.5 – CH <sub>2</sub>         | 40.6 – CH <sub>2</sub>                     | 39.4 – CH <sub>2</sub>         | 39.7 – CH <sub>2</sub>                     | 42.4 <i>t</i>                  | 41.3 – CH <sub>2</sub> | 39.4                 |
| 9    | 26.5 – CH <sub>2</sub>                     | 26.4 – CH <sub>2</sub>         | 26.4 – CH <sub>2</sub>         | 27.5 – CH <sub>2</sub>                     | 26.2 – CH <sub>2</sub>         | 26.4 – CH <sub>2</sub>                     | 23.1 <i>t</i>                  | 22.8 – CH <sub>2</sub> | 26.8                 |
| 10   | 128.2 – CH                                 | 127.5 – CH                     | 128.2 – CH                     | 129.1 – CH                                 | 127.5 – CH                     | 128.6 – CH                                 | 127.5 <i>d</i>                 | 128.6 – CH             | 122.9                |
| 11   | 132.1 – C                                  | 131.7 – C                      | 131.9 – C                      | 133.3 – C                                  | 131.9 – C                      | 132.5 – C                                  | 131.7 <i>s</i>                 | 131.6 – C              | 129.5                |
| 12   | 48.7 – CH <sub>2</sub>                     | 48.2 – CH <sub>2</sub>         | 48.2 – CH <sub>2</sub>         | 49.5 – CH <sub>2</sub>                     | 48.2 – CH <sub>2</sub>         | 48.7 – CH <sub>2</sub>                     | 48.1 <i>t</i>                  | 48.1 – CH <sub>2</sub> | 55.3                 |
| 13   | 66.5 – CH                                  | 65.6 – CH                      | 65.7 – CH                      | 67.2 – CH                                  | 65.5 – CH                      | 66.2 – CH                                  | 65.9 <i>d</i>                  | 65.9 – CH              | 198.8                |
| 14   | 129.1 – CH                                 | 128.5 – CH                     | 127.5 – CH                     | 129.9 – CH                                 | 129.2 – CH                     | 129.1 – CH                                 | 128.6 <i>d</i>                 | 127.5 – CH             | 129.1                |
| 15   | 133.5 – C                                  | 135.5 – C                      | 137.0 – C                      | 137.4 – C                                  | 135.0 – C                      | 133.7 – C                                  | 134.6 <i>s</i>                 | 134.8 – C              | 155.1                |
| 16   | 25.8 – CH <sub>3</sub>                     | 25.8 – CH <sub>3</sub>         | 25.8 – CH <sub>3</sub>         | 26.6 – CH <sub>3</sub>                     | 25.8 – CH <sub>3</sub>         | 25.7 – CH <sub>3</sub>                     | 25.8 <i>q</i>                  | 25.7 – CH <sub>3</sub> | 27.5                 |
| 17   | 18.2 – CH <sub>3</sub>                     | 18.2 – CH <sub>3</sub>         | 18.2 – CH <sub>3</sub>         | 19.0 – CH <sub>3</sub>                     | 18.2 – CH <sub>3</sub>         | 18.1 – CH <sub>3</sub>                     | 18.2 <i>q</i>                  | 18.2 – CH <sub>3</sub> | 20.5                 |
| 18   | 16.4 – CH <sub>3</sub>                     | 16.2 – CH <sub>3</sub>         | 16.2 – CH <sub>3</sub>         | 17.2 – CH <sub>3</sub>                     | 16.1 – CH <sub>3</sub>         | 16.3 – CH <sub>3</sub>                     | 16.4 <i>q</i>                  | 16.1 – CH <sub>3</sub> | 15.9                 |
| 19   | 15.9 – CH <sub>3</sub>                     | 15.9 – CH <sub>3</sub>         | 16.0 – CH <sub>3</sub>         | 16.7 – CH <sub>3</sub>                     | 15.9 – CH <sub>3</sub>         | 15.7 – CH <sub>3</sub>                     | 28.5 <i>q</i>                  | 26.7 – CH <sub>3</sub> | 16.2                 |
| 20   | 16.2 – CH <sub>3</sub>                     | 138.9 – CH                     | 175.6 – C                      | 175.3 – C                                  | 82.9 – CH                      | 82.6 – CH                                  | 16.2 <i>q</i>                  | 16.2 – CH <sub>3</sub> | 17.6                 |
| 21   |                                            |                                |                                |                                            |                                |                                            |                                |                        |                      |
| 22   |                                            |                                |                                |                                            |                                |                                            |                                |                        |                      |
| Ref. | [7]                                        | [7]                            | [7]                            |                                            | [8]                            |                                            | [9]                            | [10]                   | [19]                 |

<sup>a</sup> Chemical shifts are given in ppm and coupling constants (*J* in parentheses) in Hz; <sup>b</sup> TMS as internal standard; <sup>c</sup> Multiplicities were obtained with DEPT sequences.

Table S3 – Cont. <sup>a, b, c</sup>

|             | 15 (100 MHz)           | 15 (150 MHz)                   | 15 (62.5 MHz)                  | 15 (100 MHz)           | 15 (100 MHz)      | 16    | 18 (62.85 MHz)          | 19 (62.85 MHz)    | 20 (62.85 MHz)    |
|-------------|------------------------|--------------------------------|--------------------------------|------------------------|-------------------|-------|-------------------------|-------------------|-------------------|
| C           | CDCl <sub>3</sub>      | CDCl <sub>3</sub> <sup>*</sup> | CDCl <sub>3</sub> <sup>b</sup> |                        | CDCl <sub>3</sub> |       | CD <sub>3</sub> OD      | CDCl <sub>3</sub> | CDCl <sub>3</sub> |
| <b>1</b>    | 59.0 – CH <sub>2</sub> | 59.2                           | 59.4 – CH <sub>2</sub>         | 59.2 – CH <sub>2</sub> | 59.33             | 62.2  | 138.12 - CH             | 173.09            | 77.16             |
| <b>2</b>    | 123.0 – CH             | 123.4                          | 124.4 – CH                     | 123.4 – CH             | 123.34            | 60.8  | 110.09 – CH             | 117.31            | 53.01             |
| <b>3</b>    | 139.8 – C              | 139.4                          | 139.4 – C                      | 139.4 – C              | 139.58            | 60.5  | 124.22 – C              | 169.51            | 42.39             |
| <b>4</b>    | 39.8 – CH <sub>2</sub> | 39.4                           | 39.7 – CH <sub>2</sub>         | 39.4 – CH <sub>2</sub> | 39.46             | 37.9  | 24.04 – CH <sub>2</sub> | 24.62             | 24.85             |
| <b>5</b>    | 26.7 – CH <sub>2</sub> | 26.2                           | 26.4 – CH <sub>2</sub>         | 26.2 – CH <sub>2</sub> | 26.21             | 29.0  | 27.64 – CH <sub>2</sub> | 27.52             | 26.20             |
| <b>6</b>    | 122.7 – CH             | 124.0                          | 124.1 – CH                     | 124.0 – CH             | 123.92            | 122.8 | 122.0 – CH              | 122.45            | 122.02            |
| <b>7</b>    | 138.8 – C              | 135.0                          | 135.3 – C                      | 135.0 – C              | 135.02            | 134.9 | 134.36 – C              | 136.56            | 135.64            |
| <b>8</b>    | 39.8 – CH <sub>2</sub> | 39.3                           | 39.4 – CH <sub>2</sub>         | 39.3 – CH <sub>2</sub> | 39.29             | 38.7  | 38.46 – CH <sub>2</sub> | 39.02             | 38.44             |
| <b>9</b>    | 26.4 – CH <sub>2</sub> | 26.7                           | 26.9 – CH <sub>2</sub>         | 26.7 – CH <sub>2</sub> | 26.70             | 26.1  | 25.74 – CH <sub>2</sub> | 26.24             | 25.65             |
| <b>10</b>   | 123.5 – CH             | 129.1                          | 123.2 – CH                     | 129.1 – CH             | 129.10            | 122.3 | 123.52 – CH             | 123.02            | 122.62            |
| <b>11</b>   | 130.9 – C              | 129.5                          | 129.8 – C                      | 129.5 – C              | 129.52            | 128.4 | 128.66 – CH             | 128.37            | 128.86            |
| <b>12</b>   | 55.3 – CH <sub>2</sub> | 55.3                           | 55.5 – CH <sub>2</sub>         | 55.3 – CH <sub>2</sub> | 55.35             | 54.7  | 54.17 – CH <sub>2</sub> | 54.86             | 54.09             |
| <b>13</b>   | 199.5 - C              | 199.5                          | 199.9 – C                      | 199.5 – C              | 199.55            | 198.9 | 199.71 – C              |                   | 199.72            |
| <b>14</b>   | 124.7 – CH             | 122.8                          | 129.7 – CH                     | 122.8 – CH             | 122.80            | 129.1 | 128.46 – CH             | 128.58            | 128.32            |
| <b>15</b>   | 155.8 – C              | 155.6                          | 155.8 – C                      | 155.6 – C              | 155.68            | 155.1 | 155.63 – C              | 156.05            | 155.74            |
| <b>16</b>   | 25.1 – CH <sub>3</sub> | 27.7                           | 27.7 – CH <sub>3</sub>         | 27.7 – CH <sub>3</sub> | 27.71             | 27.1  | 18.99 – CH <sub>3</sub> | 18.05             | 18.98             |
| <b>17</b>   | 17.5 – CH <sub>3</sub> | 20.6                           | 20.7 – CH <sub>3</sub>         | 20.6 – CH <sub>3</sub> | 20.66             | 15.4  | 25.86 – CH <sub>3</sub> | 25.13             | 25.87             |
| <b>18</b>   | 17.2 – CH <sub>3</sub> | 16.3                           | 16.4 – CH <sub>3</sub>         | 16.3 – CH <sub>3</sub> | 16.36             | 15.9  | 14.64 – CH <sub>3</sub> | 15.99             | 14.66             |
| <b>19</b>   | 16.9 – CH <sub>3</sub> | 15.9                           | 16.0 – CH <sub>3</sub>         | 15.9 – CH <sub>3</sub> | 15.92             | 16.2  | 14.28 – CH <sub>3</sub> | 13.95             | 14.28             |
| <b>20</b>   | 19.9 – CH <sub>3</sub> | 16.2                           | 16.0 – CH <sub>3</sub>         | 16.2 – CH <sub>3</sub> | 16.24             | 20.1  | 141.83 - CH             | 99.47             | 175.95            |
| <b>21</b>   |                        |                                |                                |                        |                   |       |                         |                   |                   |
| <b>22</b>   |                        |                                |                                |                        |                   |       |                         |                   |                   |
| <b>Ref.</b> | [11]                   | [13]                           | [8]                            |                        | [17]              | [6]   |                         | [18]              |                   |

<sup>a</sup> Chemical shifts are given in ppm and coupling constants (*J* in parentheses) in Hz; <sup>b</sup> TMS as internal standard; <sup>c</sup> Multiplicities were obtained with DEPT sequences.

Table S3 – Cont. <sup>a, b, c</sup>

| C           | 21 (100 MHz)                   |                                            | 22 (100 MHz)                   |                                            | 23 (100 MHz)      | 25 (20.1 MHz)                  | 25 (100 MHz)                   | 26 (100 MHz)                   | 27 (100 MHz)                   | 28 (100 MHz)                   |
|-------------|--------------------------------|--------------------------------------------|--------------------------------|--------------------------------------------|-------------------|--------------------------------|--------------------------------|--------------------------------|--------------------------------|--------------------------------|
|             | CDCl <sub>3</sub> <sup>b</sup> | C <sub>6</sub> D <sub>6</sub> <sup>b</sup> | CDCl <sub>3</sub> <sup>b</sup> | C <sub>6</sub> D <sub>6</sub> <sup>b</sup> | CDCl <sub>3</sub> | CDCl <sub>3</sub> <sup>b</sup> | CDCl <sub>3</sub> <sup>b</sup> | CDCl <sub>3</sub> <sup>b</sup> | CDCl <sub>3</sub> <sup>b</sup> | CDCl <sub>3</sub> <sup>b</sup> |
| <b>1</b>    | 59.3 – CH <sub>2</sub>         | 59.3 – CH <sub>2</sub>                     | 61.4 – CH <sub>2</sub>         | 61.2 – CH <sub>2</sub>                     | 191.32            | 59.5 – CH <sub>2</sub>         | 59.2 <i>t</i>                  | 59.3 <i>t</i>                  | 65.6 <i>t</i>                  | 59.3 <i>t</i>                  |
| <b>2</b>    | 123.3 – CH                     | 125.0 – CH                                 | 118.3 – CH                     | 119.4 – CH                                 | 127.40            | 124.3 – CH                     | 124.1 <i>d</i>                 | 123.4 <i>d</i>                 | 75.0 <i>d</i>                  | 123.6 <i>d</i>                 |
| <b>3</b>    | 139.6 – C                      | 137.9 – C                                  | 142.1 – C                      | 141.5 – C                                  | 163.87            | 138.7 – C                      | 138.5 <i>s</i>                 | 139.5 <i>s</i>                 | 148.2 <i>s</i>                 | 139.3 <i>s</i>                 |
| <b>4</b>    | 39.5 – CH <sub>2</sub>         | 39.8 – CH <sub>2</sub>                     | 39.4 – CH <sub>2</sub>         | 39.6 – CH <sub>2</sub>                     | 40.56             | 34.1 – CH <sub>2</sub>         | 33.9 <i>t</i>                  | 39.5 <i>t</i>                  | 32.4 <i>t</i>                  | 35.6 <i>t</i>                  |
| <b>5</b>    | 26.2 – CH <sub>2</sub>         | 26.6 – CH <sub>2</sub>                     | 26.1 – CH <sub>2</sub>         | 26.4 – CH <sub>2</sub>                     | 25.62             | 36.3 – CH <sub>2</sub>         | 36.3 <i>t</i>                  | 26.2 <i>t</i>                  | 26.3 <i>t</i>                  | 33.3 <i>t</i>                  |
| <b>6</b>    | 124.0 – CH                     | 124.7 – CH                                 | 124.2 – CH                     | 124.3 – CH                                 | 122.64            | 201.6 – C                      | 201.1 <i>s</i>                 | 124.2 <i>d</i>                 | 123.8 <i>d</i>                 | 74.9 <i>d</i>                  |
| <b>7</b>    | 135.0 – C                      | 134.9 – C                                  | 134.3 – C                      | 134.7 – C                                  | 136.30            | 148.8 – C                      | 148.0 <i>s</i>                 | 134.8 <i>s</i>                 | 135.3 <i>s</i>                 | 151.3 <i>s</i>                 |
| <b>8</b>    | 39.2 – CH <sub>2</sub>         | 39.7 – CH <sub>2</sub>                     | 34.0 – CH <sub>2</sub>         | 34.3 – CH <sub>2</sub>                     | 39.28             | 31.0 – CH <sub>2</sub>         | 30.8 <i>t</i>                  | 39.2 <i>t</i>                  | 39.2 <i>t</i>                  | 30.8 <i>t</i>                  |
| <b>9</b>    | 26.6 – CH <sub>2</sub>         | 26.9 – CH <sub>2</sub>                     | 36.1 – CH <sub>2</sub>         | 36.3 – CH <sub>2</sub>                     | 26.68             | 27.2 – CH <sub>2</sub>         | 27.0 <i>t</i>                  | 26.6 <i>t</i>                  | 26.6 <i>t</i>                  | 26.6 <i>t</i>                  |
| <b>10</b>   | 129.4 – CH                     | 129.2 – CH                                 | 200.7 – C                      | 199.8 – C                                  | 128.90            | 123.3 – CH                     | 128.4 <i>d</i>                 | 130.2 <i>d</i>                 | 129.0 <i>d</i>                 | 129.1 <i>d</i>                 |
| <b>11</b>   | 129.4 – C                      | 129.6 – C                                  | 143.3 – C                      | 144.1 – C                                  | 129.75            | 130.8 – C                      | 130.6 <i>s</i>                 | 128.2 <i>s</i>                 | 129.5 <i>s</i>                 | 129.6 <i>s</i>                 |
| <b>12</b>   | 54.4 – CH <sub>2</sub>         | 54.4 – CH <sub>2</sub>                     | 46.4 – CH <sub>2</sub>         | 46.7 – CH <sub>2</sub>                     | 55.34             | 55.4 – CH <sub>2</sub>         | 55.2 <i>t</i>                  | 55.4 <i>t</i>                  | 55.3 <i>t</i>                  | 54.2 <i>t</i>                  |
| <b>13</b>   | 209.7 – C                      | 207.3 – C                                  | 197.1 – C                      | 196.0 – C                                  | 199.49            | 199.6 – C                      | 199.4 <i>s</i>                 | 212.0 <i>s</i>                 | 199.7 <i>s</i>                 | 209.7 <i>s</i>                 |
| <b>14</b>   | 50.5 – CH <sub>2</sub>         | 50.4 – CH <sub>2</sub>                     | 123.3 – CH                     | 123.7 – CH                                 | 122.86            | 128.6 – CH                     | 122.9 <i>d</i>                 | 51.5 <i>t</i>                  | 122.8 <i>d</i>                 | 50.8 <i>t</i>                  |
| <b>15</b>   | 24.4 – CH                      | 24.4 – CH                                  | 156.4 – C                      | 154.9 – C                                  | 155.66            | 155.8 – C                      | 155.6 <i>s</i>                 | 69.6 <i>s</i>                  | 155.8 <i>s</i>                 | 24.4 <i>s</i>                  |
| <b>16</b>   | 22.5 – CH <sub>3</sub>         | 22.6 – CH <sub>3</sub>                     | 27.7 – CH <sub>3</sub>         | 27.2 – CH <sub>3</sub>                     | 27.73             | 20.8 – CH <sub>3</sub>         | 27.7 <i>q</i>                  | 29.2 <i>q</i>                  | 27.7 <i>q</i>                  | 22.5 <i>q</i>                  |
| <b>17</b>   | 22.5 – CH <sub>3</sub>         | 22.6 – CH <sub>3</sub>                     | 20.8 – CH <sub>2</sub>         | 20.6 – CH <sub>2</sub>                     | 20.68             | 27.7 – CH <sub>3</sub>         | 20.7 <i>q</i>                  | 29.2 <i>q</i>                  | 20.7 <i>q</i>                  | 22.5 <i>q</i>                  |
| <b>18</b>   | 16.4 – CH <sub>3</sub>         | 16.5 – CH <sub>3</sub>                     | 126.9 – CH <sub>2</sub>        | 125.7 – CH <sub>2</sub>                    | 16.40             | 16.5 – CH <sub>3</sub>         | 16.5 <i>q</i>                  | 16.4 <i>q</i>                  | 16.4 <i>q</i>                  | 16.5 <i>q</i>                  |
| <b>19</b>   | 15.9 – CH <sub>3</sub>         | 16.0 – CH <sub>3</sub>                     | 16.1 – CH <sub>3</sub>         | 16.1 – CH <sub>3</sub>                     | 16.05             | 124.3 – CH <sub>2</sub>        | 124.1 <i>q</i>                 | 15.9 <i>q</i>                  | 16.0 <i>q</i>                  | 110.1 <i>q</i>                 |
| <b>20</b>   | 16.2 – CH <sub>3</sub>         | 16.2 – CH <sub>3</sub>                     | 16.5 – CH <sub>3</sub>         | 16.3 – CH <sub>3</sub>                     | 17.60             | 16.5 – CH <sub>3</sub>         | 16.2 <i>q</i>                  | 16.3 <i>q</i>                  | 110.8 <i>t</i>                 | 16.3 <i>q</i>                  |
| <b>21</b>   |                                |                                            | 171.2 – C                      | 170.2 – C                                  |                   |                                |                                |                                |                                |                                |
| <b>22</b>   |                                |                                            | 21.1 – CH <sub>3</sub>         | 20.6 – CH <sub>3</sub>                     |                   |                                |                                |                                |                                |                                |
| <b>Ref.</b> | [8]                            |                                            | [8]                            |                                            | [17]              | [8]                            | [9]                            | [9]                            | [9]                            | [9]                            |

<sup>a</sup> Chemical shifts are given in ppm and coupling constants (*J* in parentheses) in Hz; <sup>b</sup> TMS as internal standard; <sup>c</sup> Multiplicities were obtained with DEPT sequences.

Table S3 – Cont. <sup>a, b, c</sup>

|             | 29 (100 MHz)                   | 30 (100 MHz)                   | 31 (150 MHz)      | 32 (150 MHz)      | 33 (150 MHz)      | 34 (150 MHz)      | 35 (600 MHz)      | 36 (600 MHz)      |
|-------------|--------------------------------|--------------------------------|-------------------|-------------------|-------------------|-------------------|-------------------|-------------------|
| C           | CDCl <sub>3</sub> <sup>b</sup> | CDCl <sub>3</sub> <sup>b</sup> | CDCl <sub>3</sub> | CDCl <sub>3</sub> | CDCl <sub>3</sub> | CDCl <sub>3</sub> | CDCl <sub>3</sub> | CDCl <sub>3</sub> |
| <b>1</b>    | 59.2 <i>t</i>                  | 59.3 <i>t</i>                  | 171.8             | 174.2             | 171.9             | 59.4              | 60.7              | 142.6             |
| <b>2</b>    | 123.6 <i>d</i>                 | 124.2 <i>d</i>                 | 115.2             | 115.6             | 115.2             | 123.3             | 117.6             | 111.1             |
| <b>3</b>    | 139.3 <i>s</i>                 | 138.2 <i>s</i>                 | 163.0             | 170.3             | 162.9             | 139.8             | 143.2             | 125.0             |
| <b>4</b>    | 35.6 <i>t</i>                  | 42.1 <i>t</i>                  | 41.2              | 28.7              | 41.2              | 39.5              | 39.5              | 25.0              |
| <b>5</b>    | 33.4 <i>t</i>                  | 125.2 <i>d</i>                 | 25.9              | 25.6              | 25.9              | 26.3              | 26.2              | 28.5              |
| <b>6</b>    | 74.8 <i>d</i>                  | 138.7 <i>d</i>                 | 122.9             | 122.1             | 123.0             | 124.0             | 123.7             | 123.9             |
| <b>7</b>    | 151.3 <i>s</i>                 | 72.9 <i>s</i>                  | 136.1             | 137.3             | 135.9             | 135.8             | 135.3             | 135.6             |
| <b>8</b>    | 30.9 <i>t</i>                  | 42.3 <i>t</i>                  | 39.3              | 39.3              | 39.3              | 39.4              | 39.4              | 39.5              |
| <b>9</b>    | 26.7 <i>t</i>                  | 23.1 <i>t</i>                  | 26.7              | 26.6              | 26.6              | 25.7              | 26.8              | 26.6              |
| <b>10</b>   | 128.8 <i>d</i>                 | 129.3 <i>d</i>                 | 129.0             | 128.7             | 129.0             | 40.8              | 129.2             | 126.6             |
| <b>11</b>   | 130.0 <i>s</i>                 | 129.8 <i>s</i>                 | 129.7             | 130.0             | 129.4             | 158.1             | 129.6             | 131.8             |
| <b>12</b>   | 55.1 <i>t</i>                  | 55.1 <i>t</i>                  | 55.4              | 55.3              | 54.5              | 125.7             | 55.5              | 38.5              |
| <b>13</b>   | 199.8 <i>s</i>                 | 199.3 <i>s</i>                 | 199.7             | 199.4             | 209.9             | 191.8             | 199.5             | 154.5             |
| <b>14</b>   | 122.9 <i>d</i>                 | 122.9 <i>d</i>                 | 122.8             | 122.9             | 50.5              | 126.3             | 122.8             | 108.8             |
| <b>15</b>   | 156.0 <i>s</i>                 | 155.9 <i>s</i>                 | 155.9             | 155.8             | 24.4              | 154.5             | 155.7             | 120.5             |
| <b>16</b>   | 27.7 <i>q</i>                  | 27.7 <i>q</i>                  | 27.8              | 27.8              | 22.6              | 27.7              | 27.8              | 137.7             |
| <b>17</b>   | 20.7 <i>q</i>                  | 20.7 <i>q</i>                  | 20.7              | 20.7              | 22.6              | 20.7              | 20.7              | 9.9               |
| <b>18</b>   | 16.5 <i>q</i>                  | 16.4 <i>q</i>                  | 16.4              | 16.5              | 16.4              | 19.2              | 16.4              | 15.9              |
| <b>19</b>   | 110.0 <i>t</i>                 | 28.2 <i>q</i>                  | 16.0              | 16.2              | 16.0              | 16.3              | 16.0              | 16.1              |
| <b>20</b>   | 16.3 <i>q</i>                  | 16.3 <i>q</i>                  | 19.2              | 73.2              | 19.2              | 16.4              | 16.5              | 138.8             |
| <b>21</b>   |                                |                                |                   |                   |                   |                   | 161.2             |                   |
| <b>22</b>   |                                |                                |                   |                   |                   |                   |                   |                   |
| <b>Ref.</b> | [9]                            | [9]                            | [13]              | [13]              | [13]              | [13]              | [14]              | [14]              |

<sup>a</sup> Chemical shifts are given in ppm and coupling constants (*J* in parentheses) in Hz; <sup>b</sup> TMS as internal standard; <sup>c</sup> Multiplicities were obtained with DEPT sequences.

Table S3 – Cont. <sup>a, b, c</sup>

|             | 40 (50 MHz)                    | 40 (100.5 MHz)                 | 41 (100.5 MHz)                 | 42 (50 MHz)                    | 43 (100 MHz)                   | 44 (600 MHz)      |
|-------------|--------------------------------|--------------------------------|--------------------------------|--------------------------------|--------------------------------|-------------------|
| C           | CDCl <sub>3</sub> <sup>b</sup> | CDCl <sub>3</sub> <sup>b</sup> | CDCl <sub>3</sub> <sup>b</sup> | CDCl <sub>3</sub> <sup>b</sup> | CDCl <sub>3</sub> <sup>b</sup> | CDCl <sub>3</sub> |
| <b>1</b>    | 59.0 <i>t</i> (6.8)            | 59.0                           | 59.4                           | 59.4 – CH <sub>2</sub>         | 59.4 <i>t</i>                  | 59.4              |
| <b>2</b>    | 123.4 <i>d</i> (6.8)           | 123.3                          | 123.4                          | 123.4 – CH                     | 123.3 <i>d</i>                 | 123.3             |
| <b>3</b>    | 139.1 <i>s</i>                 | 139.1                          | 139.7                          | 139.6 – C                      | 139.9 <i>s</i>                 | 139.8             |
| <b>4</b>    | 39.4 <i>t</i>                  | 39.4                           | 39.6                           | 39.5 – CH <sub>2</sub>         | 39.9 <i>t</i>                  | 39.3              |
| <b>5</b>    | 26.5 <i>t</i>                  | 26.5                           | 26.3                           | 26.4 – CH <sub>2</sub>         | 22.6 <i>t</i>                  | 26.3              |
| <b>6</b>    | 123.8 <i>d</i> (6.8)           | 123.8                          | 123.9                          | 124.5 – CH                     | 41.0 <i>t</i>                  | 123.9             |
| <b>7</b>    | 135.0 <i>s</i>                 | 135.0                          | 135.3                          | 134.6 – C                      | 82.8 <i>s</i>                  | 134.6             |
| <b>8</b>    | 39.4 <i>t</i>                  | 39.4                           | 39.6                           | 43.1 – CH <sub>2</sub>         | 37.2 <i>t</i>                  | 39.7              |
| <b>9</b>    | 26.2 <i>t</i>                  | 26.2                           | 26.7                           | 125.6 – CH                     | 30.8 <i>t</i>                  | 26.6              |
| <b>10</b>   | 125.1 <i>d</i> (6.8)           | 125.1                          | 125.2                          | 135.9 – CH                     | 84.5 <i>d</i>                  | 124.5             |
| <b>11</b>   | 133.5 <i>s</i>                 | 133.5                          | 133.7                          | 131.8 – C                      | 134.9 <i>s</i>                 | 135.3             |
| <b>12</b>   | 42.7 <i>t</i> (7.2)            | 42.7                           | 42.4                           | 129.4 – CH                     | 125.4 <i>d</i>                 | 39.6              |
| <b>13</b>   | 128.7 <i>d</i> (7.2; 15.6)     | 128.7                          | 125.4                          | 27.2 – CH <sub>2</sub>         | 26.8 <i>t</i>                  | 26.2              |
| <b>14</b>   | 133.7 <i>d</i> (15.6)          | 133.7                          | 139.2                          | 122.5 – CH                     | 122.8 <i>d</i>                 | 126.2             |
| <b>15</b>   | 141.9 <i>s</i>                 | 141.9                          | 70.7                           | 133.3 – C                      | 131.5 <i>s</i>                 | 134.7             |
| <b>16</b>   | 114.3 <i>t</i>                 | 18.5                           | 29.8                           | 25.7 – CH <sub>3</sub>         | 25.6 <i>q</i>                  | 69.1              |
| <b>17</b>   | 18.5 <i>q</i>                  | 114.3                          | 29.8                           | 17.7 – CH <sub>3</sub>         | 17.7 <i>q</i>                  | 13.7              |
| <b>18</b>   | 15.9 <i>q</i>                  | 15.9                           | 16.0                           | 12.5 – CH <sub>3</sub>         | 11.4 <i>q</i>                  | 16.0              |
| <b>19</b>   | 15.8 <i>q</i>                  | 15.8                           | 16.0                           | 16.1 – CH <sub>3</sub>         | 26.7 <i>q</i>                  | 16.0              |
| <b>20</b>   | 16.1 <i>q</i>                  | 16.1                           | 16.3                           | 16.2 – CH <sub>3</sub>         | 16.1 <i>q</i>                  | 16.3              |
| <b>21</b>   |                                |                                |                                |                                |                                |                   |
| <b>22</b>   |                                |                                |                                |                                |                                |                   |
| <b>Ref.</b> | [2]                            | [16]                           | [16]                           | [3]                            | [5]                            | [14]              |

<sup>a</sup> Chemical shifts are given in ppm and coupling constants (*J* in parentheses) in Hz; <sup>b</sup> TMS as internal standard; <sup>c</sup> Multiplicities were obtained with DEPT sequences



## References

1. Valls R, Banaigs B, Francisco C, Codomier L, Cave A (1986) An acyclic diterpene from the brown alga *Bifurcaria bifurcata*. *Phytochemistry* 25:751–752
2. Semmak L, Zerzouf A, Valls R, Banaigs B, Jeanty G, Francisco C (1988) Acyclic diterpenes from *Bifurcaria bifurcata*. *Phytochemistry* 27:2347–2349
3. Culioli G, Daoudi M, Ortalo-magne A, Valls R, Piovetti L (2001) ( S )-12-Hydroxygeranylgeraniol-derived diterpenes from the brown alga *Bifurcaria bifurcata*. *Phytochemistry* 57:529–535
4. Culioli G, Ortalo-Magné A, Daoudi M, Thomas-Guyon H, Valls R, Piovetti L (2004) Trihydroxylated linear diterpenes from the brown alga *Bifurcaria bifurcata*. *Phytochemistry* 65:2063–2069
5. El Hattab M, Ben Mesaoud M, Daoudi M, Ortalo-Magné A, Culioli G, Valls R, Piovetti L (2008) Trihydroxylated linear diterpenes from the brown alga *Bifurcaria bifurcata*. *Biochem Syst Ecol* 36:484–489
6. Biard JF, Verbist JF, Floch R, Letourneux Y (1980) Epoxieleganolone et eleganediol, deux nouveaux diterpenes de *Bifurcaria bifurcata* Ross (Cystoseiracees). *Tetrahedron Lett* 21:1849–1852
7. Valls R, Piovetti L, Banaigs B, Archavlis A, Pellegrini M (1995) (S)-13-hydroxygeranylgeraniol-derived furanoditerpenes from *Bifurcaria bifurcata*. *Phytochemistry* 39:145–149
8. Culioli G, Daoudi M, Mesguiche V, Valls R, Piovetti L (1999) Geranylgeraniol-derived diterpenoids from the brown alga *Bifurcaria bifurcata*. *Phytochemistry* 52:1447–1454
9. Ortalo-Magné A, Culioli G, Valls R, Pucci B, Piovetti L (2005) Polar acyclic diterpenoids from *Bifurcaria bifurcata* (Fucales, Phaeophyta). *Phytochemistry* 66:2316–2323
10. Smyrniotopoulos V, Merten C, Kaiser M, Tasdemir D (2017) Bifurcatriol, a new antiprotozoal acyclic diterpene from the brown alga *Bifurcaria bifurcata*. *Mar Drugs* 15:1–10
11. Gallé J, Attitoua B, Kaiser M, Rusig A, Lobstein A, Vonthron-Sénécheau C (2013) Eleganolone , a Diterpene from the French Marine Alga *Bifurcaria bifurcata* Inhibits Growth of the Human Pathogens *Trypanosoma brucei* and *Plasmodium falciparum*. *Mar Drugs* 11:599–610
12. Combaut G, Piovetti L (1983) A novel acyclic diterpene from the brown alga *Bifurcaria bifurcata*. *Phytochemistry* 22:1787–1789
13. Göthel Q, Lichte E, Köck M (2012) Further eleganolone-derived diterpenes from the brown alga *Bifurcaria bifurcata*. *Tetrahedron Lett* 53:1873–1877
14. Göthel Q, Muñoz J, Köck M (2012) Formyleleganolone and bibifuran, two metabolites from the brown alga *Bifurcaria bifurcata*. *Phytochem Lett* 5:693–695
15. Santos S, Trindade S, Oliveira C, et al (2017) Lipophilic fraction of cultivated *Bifurcaria bifurcata* R. Ross: Detailed composition and *in vitro* prospection of current challenging bioactive properties. *Mar Drugs* 15:340
16. Valls, R; Banaigs, B; Piovetti, L; Archavlis, A; Artaud J (1993) Linear diterpene with antimitotic activity from the brown alga *Bifurcaria bifurcata*. *Phytochemistry* 34:1585–1588
17. Silva J, Alves C, Freitas R, Martins A, Pinteus S, Ribeiro J, Gaspar H, Alfonso A, Pedrosa R (2019) Antioxidant and Neuroprotective Potential of the Brown Seaweed *Bifurcaria bifurcata* in an *in vitro* Parkinson ' s Disease Model. *Mar Drugs* 17:1–16
18. Hougaard L, Anthoni U, Christophersen C, Nielsen PH (1991) Eleganolone derived diterpenes from *Bifurcaria bifurcata*. *Phytochemistry* 30:3049–3051
19. Biard JF, Verbist JF, Letoumeux Y (1980) Cétols Diterpeniques à Activite Antimicrobienne de *Bifurcaria bifurcata*. *J Med Plant Res* 40:288–294
